# Supplementary material
Source: PubMed Central journal article supplement (PMC6185811)
Supplement: NIHMS968294-supplement-supplement_1.pdf [file NIHMS968294-supplement-supplement_1.pdf]

**Supplemental Table S1. All results obtained with assays performed on MEEs at the patient level.**

| Samples   | Significant  |              |        |                   |                      |       |
|-----------|--------------|--------------|--------|-------------------|----------------------|-------|
|           | Hearing Loss | Age (months) | Gender | Asthma/Bronchitis | Mucoid(1)/Serous (0) | Muc5B |
| D001      | 0            | 47           | 0      | 1                 | 1                    | 1     |
| D002      | 1            | 17           | 1      | 1                 | 1                    | 1     |
| D003 (S1) | 1            | 59           | 1      | 0                 | 0                    | 0     |
| D004 (S2) | 1            | 146          | 1      | 0                 | 0                    | 1     |
| D005      | 1            | 12           | 1      | 0                 | 1                    | 1     |
| D006      | 0            | 23           | 0      | 1                 | 0                    | 1     |
| D007 (M1) | 1            | 79           | 0      | 0                 | 1                    | 1     |
| D008      | 1            | 20           | 1      | 0                 | 1                    | 1     |
| D009      | 0            | 15           | 1      | 0                 | 1                    | 1     |
| D010 (M2) | 1            | 20           | 1      | 0                 | 1                    | 1     |
| D011      | 0            | 43           | 0      | 0                 | 1                    | 1     |
| D012      | 1            | 19           | 0      | 1                 | 1                    | 1     |
| D013      | 1            | 15           | 1      | 0                 | 1                    | 1     |
| D014      | 1            | 15           | 1      | 0                 | 1                    | 1     |
| D015      | 1            | 54           | 0      | 1                 | 1                    | 1     |
| D016      | 1            | 44           | 0      | 0                 | 1                    | 1     |
| D017      | 0            | 14           | 0      | 0                 | 1                    | 1     |
| D018      | 0            | 73           | 0      | 0                 | 1                    | 1     |
| D019      | 1            | 46           | 0      | 0                 | 1                    | 1     |
| D020      | 1            | 10           | 0      | 0                 | 1                    | 1     |
| D021      | 1            | 9            | 0      | 1                 | 1                    | 1     |
| D022      | 1            | 13           | 1      | 1                 | 1                    | 1     |
| D023      | 0            | 23           | 0      | 0                 | 1                    | 1     |
| D024      | 0            | 104          | 1      | 0                 | 1                    | 1     |
| D025      | 1            | 15           | 0      | 1                 | 1                    | 1     |
| D026      | 1            | 104          | 0      | 0                 | 1                    | 1     |
| D027      | 1            | 3            | 1      | 0                 | 0                    | 1     |
| D028      | 1            | 43           | 0      | 1                 | 1                    | 1     |
| D029      | 1            | 14           | 0      | 1                 | 0                    | 1     |
| D030 (S3) | 1            | 63           | 0      | 1                 | 0                    | 1     |
| D031      | 1            | 26           | 0      | 0                 | 0                    | 1     |
| D032      | 0            | 92           | 0      | 0                 | 1                    | 1     |
| D033 (M3) | 1            | 22           | 1      | 1                 | 1                    | 1     |
| D034      | 1            | 27           | 0      | 0                 | 1                    | 1     |
| D035      | 1            | 25           | 0      | 0                 | 0                    | 1     |
| D036      | 0            | 33           | 0      | 0                 | 1                    | 1     |
| D037      | 0            | 31           | 0      | 0                 | 1                    | 1     |
| D038      | 0            | 53           | 1      | 1                 | 1                    | 1     |
| D039      | 1            | 21           | 1      | 0                 | 1                    | 1     |
| D040      | 0            | 73           | 0      | 1                 | 1                    | 1     |

|                          |   |     |   |   |       |           |
|--------------------------|---|-----|---|---|-------|-----------|
| D041                     | 1 | 24  | 0 | 0 | 1     | 1         |
| D042                     | 1 | 19  | 0 | 0 | 1     | 1         |
| D043                     | 0 | 66  | 0 | 0 | 1 N/A |           |
| D044                     | 1 | 7   | 0 | 0 | 1     | 1         |
| D045                     | 1 | 30  | 0 | 0 | 1     | 1         |
| D046                     | 1 | 19  | 0 | 0 | 1     | 1         |
| D047                     | 1 | 64  | 0 | 1 | 1     | 1         |
| D048                     | 1 | 22  | 1 | 1 | 1     | 1         |
| D049                     | 1 | 37  | 0 | 1 | 1     | 1         |
| D050                     | 1 | 80  | 1 | 0 | 1     | 1         |
| D051                     | 1 | 19  | 0 | 0 | 1     | 1         |
| D052                     | 1 | 10  | 0 | 0 | 1     | 1         |
| D053                     | 1 | 55  | 0 | 1 | 0     | 1         |
| D054                     | 1 | 176 | 1 | 0 | 0     | 0         |
| D055                     | 0 | 37  | 0 | 0 | 0     | 0         |
| D056                     | 1 | 6   | 0 | 0 | 1     | 1         |
| D057                     | 1 | 63  | 0 | 0 | 0     | 1         |
| D058                     | 0 | 33  | 0 | 0 | 1     | 1         |
| <b>Number of samples</b> |   |     |   |   |       | <b>57</b> |

**NOTES:**

0=no      0=serous  
1=yes      1=mucoid

All cytokines are measured in pg/ml

S1, S2, S3, M1, M2, M3 are the labels used for the 6 samples used for proteomics analysis

| Muc5AC | Protein Concentration- BCA (mg/ml) | dsDNA- Qubit (ng/ul) | DNA- Nanodrop (ng/ul) |
|--------|------------------------------------|----------------------|-----------------------|
| 0      | 10.69                              | 22.8                 | 28.5                  |
| 0      | 8.73                               | 41.2                 | 43.68                 |
| 0      | 9.93                               | 3.24 N/A             |                       |
| 0      | 7.93                               | 2.24 N/A             |                       |
| 1      | 3.35                               | 27.4                 | 28.91                 |
| 0 N/A  | N/A                                | N/A                  |                       |
| 1      | 10.59                              | 82.4                 | 86.01                 |
| 0      | 3.29                               | 0.836                | 4.059                 |
| 0      | 1.81                               | 8.08                 | 11.51                 |
| 0      | 5.28                               | 51.4 N/A             |                       |
| 1      | 23.58                              | 66                   | 69.16                 |
| 0      | 6.13                               | 23.3                 | 25.88                 |
| 0      | 2.76                               | 1.7                  | 4.077                 |
| 1      | 8.43                               | 2.88                 | 3.56                  |
| 1      | 21.61                              | 260                  | 251                   |
| 0      | 15.51                              | 15.6                 | 15.82                 |
| 0      | 8.05                               | 164                  | 137.2                 |
| 0      | 4.98                               | 7.52                 | 9.827                 |
| 0      | 1.35                               | 0.936                | 2.624                 |
| 1      | 20.38                              | 324                  | 238.8                 |
| 0      | 3.4                                | 4.84                 | 8.075                 |
| 1      | 29.35 N/A                          | N/A                  |                       |
| 1      | 9.38                               | 39.7                 | 39.23                 |
| 1      | 52.35                              | 208                  | 178.1                 |
| 1      | 17.82                              | 112                  | 95.33                 |
| 1      | 44.13                              | 208                  | 150.9                 |
| 1      | 38.02                              | 19.2                 | 20.27                 |
| 1      | 20.54                              | 181                  | 143.2                 |
| 1      | 36.23                              | 1.16                 | 4.144                 |
| 0      | 17.05                              | 1.33                 | 2.954                 |
| 1      | 27.26                              | 15.9                 | 15.77                 |
| 1      | 23.45                              | 14                   | 14.28                 |
| 0 N/A  |                                    | 198                  | 71.49                 |
| 0      | 24.46                              | 67.6                 | 13.12                 |
| 1      | 19.8                               | 8.8                  | 119                   |
| 1      | 72.92                              | 272                  | 16.94                 |
| 0      | 24.52                              | 14                   | 31.59                 |
| 1      | 6.97                               | 30.6                 | 4.129                 |
| 1      | 11.5                               | 4.64                 | 64.61                 |
| 1      | 24.65                              | 216                  | 29.14                 |

|     |           |           |           |           |
|-----|-----------|-----------|-----------|-----------|
|     | 1         | 22.8      | 27.9      | 41.55     |
|     | 1         | 16.02     | 42.4      | 18.46     |
| N/A |           | 28.2      | 17.9      | 86.96     |
|     | 1         | 25.07     | 96.4      | 27.41     |
|     | 1         | 26.63     | 28.8      | 56.6      |
|     | 1         | 10.39     | 114       | 9.876     |
|     | 1         | 22.98     | 9.96      | 52.76     |
|     | 1         | 8.59      | 49.6      | 19.87     |
|     | 1         | 17.81     | 20.2      | 18.71     |
|     | 1         | 6.63      | 42.4      | 41.53     |
|     | 1         | 5.43      | 64.2      | 39.94     |
|     | 1         | 5.37 N/A  | N/A       |           |
|     | 1         | 9.5       | 40        | 39.94     |
|     | 0         | 8.48      | 0.464     | 2.358     |
|     | 1         | 1.54      | 106       | 91.01     |
|     | 1         | 2.93      | 15.7      | 19.04     |
|     | 1         | 7.44      | 3.01      | 6.625     |
|     | 1         | 2.68      | 7.72      | 10.63     |
|     | <b>57</b> | <b>56</b> | <b>55</b> | <b>51</b> |





| VEGF   | MUC5B pixel |
|--------|-------------|
| 643.75 | 45736.34    |
| 1192   | 90403.58    |
| 6.45   | 562.749     |
| 10.26  | 2839.69     |
| 546.99 | 159166.1    |
| 24.5   | 772.21      |
| 314.23 | 174422.6    |
| 139.41 | 66815.86    |
| 36.9   | 46361.3     |
| 484.07 | 3852.761    |
| 804.16 | 0           |
| 275.56 | 76791.14    |
| 152.57 | 10700.09    |
| 107.46 | 0           |
| 1915   | 29176.78    |
| 228.29 | 78094.69    |
| 460.86 | 18152.7     |
| 107.46 | 41058.93    |
| 86.45  | 0           |
| 460.86 | 85829.07    |
| 157.11 | 52836.1     |
| 468.63 | 192641.5    |
| 384.91 | 16098.58    |
| 612.77 | 57196.36    |
| 549.47 | 189804.2    |
| 915.56 | 5410        |
| 400    | 3546        |
| 569.15 | 6439.98     |
| 370.15 | 7362        |
| 494.28 | 4479        |
| 872.35 | 813.3       |
| 239.65 | 3366        |
| 636.63 | 6653        |
| 639    | 7174        |
| 539.55 |             |
| 1050   | 139168.2    |
| 341.57 | 89116.57    |
| 537.06 | 0           |
| 554.41 | 20462.3     |
| N/A    | 81457.14    |

|     |          |
|-----|----------|
| N/A | 42218.78 |
| N/A | 40576.42 |
| N/A | 154796.2 |
| N/A | 70309.22 |
| N/A | 45250.35 |
| N/A | 8700.723 |
| N/A | 2088.205 |
| N/A | N/A      |

**39            46**



**Supplemental Table S2: Demographics of patients.**

M1, M2 and M3 are mucoid samples, S1, S2 and S3 are serous samples. F=female, M=male.

| <b>Patient sample name</b> | <b>Hearing loss</b> | <b>Allergy</b> | <b>Age (months)</b> | <b>Gender</b> | <b>Previous tube</b> | <b>Asthma/ Bronchitis</b> |
|----------------------------|---------------------|----------------|---------------------|---------------|----------------------|---------------------------|
| <b>M1</b>                  | yes                 | no             | 79                  | F             | no                   | no                        |
| <b>M2</b>                  | yes                 | no             | 20                  | M             | no                   | no                        |
| <b>M3</b>                  | yes                 | no             | 22                  | M             | no                   | yes                       |
| <b>S1</b>                  | yes                 | no             | 59                  | M             | no                   | no                        |
| <b>S2</b>                  | yes                 | no             | 146                 | M             | yes                  | no                        |
| <b>S3</b>                  | yes                 | no             | 63                  | F             | yes                  | yes                       |

M1, M2 and M3 are mucoid samples, S1, S2 and S3 are serous samples. F=female, M=male.

**Suppleme**

The numb

**accession**

P60709  
P02788  
Q8TDL5  
P35579  
P05164  
P02675  
P13796  
Q9HC84  
P06702  
P01876  
P06396  
P06733  
P21333  
P30740  
P14618  
P01861  
P12814  
P08670  
P01011  
P04406  
P68032  
P62805  
P04083  
P0CG05  
P02751  
P29401  
P26038  
P11215  
P01833  
P08133  
P08311  
Q9NP55  
O43707  
P12429  
P11142  
P00751  
P08107  
Q562R1  
P04040  
P06744

P14780  
P08246  
P00558  
P11021  
P68133  
P07900  
P08238  
P34931  
P17213  
P06312  
P63104  
P58876  
P07437  
Q9BQE3  
P23527  
P24158  
P27105  
P07355  
P52209  
P00338  
P00915  
P40121  
P18136  
P04207  
P04075  
P46940  
Q9Y490  
P80188  
P07737  
P41218  
P09960  
P31146  
P07237  
P68104  
P14625  
P06737  
P60174  
P08758  
P22894  
P40199  
P52566  
P31946  
Q99536  
P20160

P68371  
P01625  
P52790  
P04899  
P80723  
P04839  
Q01518  
P69891  
P23528  
P61160  
P11413  
Q9Y6R7  
P09211  
P61158  
P22314  
P18206  
P30101  
P18669  
Q00610  
Q16777  
P05107  
P28676  
P43490  
Q96KK5  
P31997  
P37837  
P01781  
P08575  
O60814  
Q6UX06  
P80748  
P06899  
O15144  
P61626  
P06753  
P06576  
P04004  
P51884  
P50395  
Q86UX7  
P36222  
P01766  
Q9UGM3  
P27824

P68366  
P62258  
P51149  
P02533  
P19105  
P08185  
P78385  
Q15323  
P09525  
Q13885  
Q9UM07  
P07195  
P16104  
P27797  
O15143  
P67936  
P15153  
O15145  
O00299  
P52907  
P01880  
O75083  
Q13813  
P05109  
P06727  
P62158  
P02538  
Q9HDC9  
P60660  
P04179  
P19971  
P61981  
P25705  
P78386  
Q14533  
O43790  
P02792  
Q9NUQ9  
P50995  
P13688  
P61026  
P55072  
O76009  
P15311

Q12913  
P49913  
Q14525  
P52565  
P20061  
P29966  
P30044  
P0CG48  
P17931  
P27348  
Q04917  
Q7Z794  
P02794  
P80511  
P47756  
A6NL28  
P00491  
P23284  
P37802  
P20700  
P20702  
P35241  
Q14697  
P07339  
P09467  
O75367  
P0C0S5  
P23381  
P12724  
P22626  
P62937  
O76011  
P14598  
O00160  
P02786  
P13667  
Q13231  
Q15084  
P61204  
P04208  
O75874  
P26583  
P00747  
P50552

Q07960  
P61978  
P40925  
P43652  
P10643  
P22392  
P31150  
P78324  
Q15149  
P68431  
P55058  
P01608  
Q01082  
Q16851  
P51159  
P62826  
P04080  
P01031  
P29508  
P31943  
P40926  
P61586  
P61224  
P15144  
P30041  
P06748  
P26641  
P62820  
Q14532  
Q15907  
O14818  
Q06830  
P16401  
O00602  
P10412  
P50453  
P60900  
P61019  
P31949  
P07384  
P60953  
P61106  
O00764  
P32942

P54819  
Q96QK1  
P48595  
P59998  
P01714  
P01721  
O75131  
P05141  
P10153  
P13646  
P26447  
Q96CX2  
Q99497  
P07910  
P13489  
P04003  
O43451  
P22061  
P29350  
P63000  
Q13510  
Q92764  
Q9H0U4  
Q9H4M9  
O15511  
P51148  
Q9UJ70  
P01613  
P01743  
P09651  
P09917  
P21796  
P38606  
P62993  
Q92542  
Q9UJU6  
P15531  
P84095  
P01611  
P07686  
P09972  
P16190  
P18085  
P19878



P30464  
P49755  
Q10588  
Q9ULZ3  
P05089  
Q9H299  
Q14019  
Q96C19  
P08729  
P16188  
P30460  
Q16555  
Q6IBS0  
P30086  
Q15080  
O75347  
Q92930  
P13671  
O75369  
P12236  
P19367  
P20618  
P25786  
P50990  
Q6P4A8  
P62491  
P24821  
O75368  
P01889  
P01903  
P11234  
P12273  
P13498  
P19013  
P23526  
P27695  
P30040  
P30048  
P39656  
P52597  
Q15631  
Q99714  
Q9BRF8  
O43490

O60234  
P00390  
P00403  
P04434  
P07741  
P08567  
P08754  
P11279  
P35237  
P54920  
P61020  
P62834  
P84085  
Q5TFQ8  
Q96DA0  
P28838  
O00148  
O00560  
O75955  
P04632  
P07858  
P22079  
P24539  
P25787  
P35232  
P36871  
P61088  
P61225  
Q14254  
Q16531  
Q5JTV8  
Q92928  
O95336  
P00492  
P25815  
P62136  
P62873  
P00736  
O60664  
P07203  
P13760  
P16152  
P16930  
P17858

P25788  
P28072  
P39687  
P45880  
P49721  
P51572  
P53634  
P60842  
P61163  
P62942  
Q03591  
Q15691  
Q16539  
Q29865  
Q8IUE6  
Q92688  
Q96KP4  
Q99623  
Q99828  
Q9NUV9  
Q9Y277  
P08865  
P28070  
P59665  
Q14974  
P01040  
P14550  
O95436  
P04229  
P04792  
P05091  
P05186  
P07108  
P07358  
P10316  
P13761  
P14314  
P16083  
P22695  
P25774  
P28482  
P30050  
P30084  
P61604

Q07020  
Q12905  
Q14980  
Q32P51  
Q8IX19  
Q96FW1  
P57737  
P41222  
Q06033  
O14773  
O76015  
O95716  
P01912  
P05023  
P07305  
P11233  
P12035  
P13693  
P20073  
P28065  
P28066  
P36542  
P48047  
P48735  
P49720  
P51991  
Q12907  
Q13636  
Q16666  
Q16881  
Q7KZF4  
Q92522  
Q96AZ6  
Q96HE7  
Q9NSB4  
Q9Y2Q3  
Q9Y6N5  
O75390  
P02810  
P05543  
P06311  
P80108  
P08637  
P55786

Q92882  
Q9HC38  
Q9UBR2  
P02654  
P00746  
P02656  
P00734  
P35858  
P01617  
P06316  
P09871  
P03952  
P00488  
P22492  
P01719  
P06276  
P07333  
P02746  
O00391  
P02549  
P22792  
Q96PD5  
P20742  
P23142  
O14791  
P04259  
P01593  
P06314  
P11277  
P00748  
P07225  
P15169  
P69892  
P06313  
P01619  
P19320  
P33151  
Q04756  
Q6EMK4  
P05452  
P01612  
P16157  
P16403  
P43251

Q16610  
P01034  
P06310  
Q15063  
P06317

**Table S3. Proteins detected by mass spectrometry in middle ear effusions.**

Proteins represent the peptide counts for the mucoid (M1, M2, M3) and serous (S1, S2 and S3) samples as well

**description**

Actin, cytoplasmic 1 OS=Homo sapiens GN=ACTB PE=1 SV=1 - [ACTB\_HUMAN]  
 Lactotransferrin OS=Homo sapiens GN=LTF PE=1 SV=6 - [TRFL\_HUMAN]  
 BPI fold-containing family B member 1 OS=Homo sapiens GN=BPIFB1 PE=2 SV=1 - [BPIB1\_HUMAN]  
 Myosin-9 OS=Homo sapiens GN=MYH9 PE=1 SV=4 - [MYH9\_HUMAN]  
 Myeloperoxidase OS=Homo sapiens GN=MPO PE=1 SV=1 - [PERM\_HUMAN]  
 Fibrinogen beta chain OS=Homo sapiens GN=FGB PE=1 SV=2 - [FIBB\_HUMAN]  
 Plastin-2 OS=Homo sapiens GN=LCP1 PE=1 SV=6 - [PLSL\_HUMAN]  
 Mucin-5B OS=Homo sapiens GN=MUC5B PE=1 SV=3 - [MUC5B\_HUMAN]  
 Protein S100-A9 OS=Homo sapiens GN=S100A9 PE=1 SV=1 - [S10A9\_HUMAN]  
 Ig alpha-1 chain C region OS=Homo sapiens GN=IGHA1 PE=1 SV=2 - [IGHA1\_HUMAN]  
 Gelsolin OS=Homo sapiens GN=GSN PE=1 SV=1 - [GELS\_HUMAN]  
 Alpha-enolase OS=Homo sapiens GN=ENO1 PE=1 SV=2 - [ENOA\_HUMAN]  
 Filamin-A OS=Homo sapiens GN=FLNA PE=1 SV=4 - [FLNA\_HUMAN]  
 Leukocyte elastase inhibitor OS=Homo sapiens GN=SERPINB1 PE=1 SV=1 - [ILEU\_HUMAN]  
 Pyruvate kinase isozymes M1/M2 OS=Homo sapiens GN=PKM PE=1 SV=4 - [KPYM\_HUMAN]  
 Ig gamma-4 chain C region OS=Homo sapiens GN=IGHG4 PE=1 SV=1 - [IGHG4\_HUMAN]  
 Alpha-actinin-1 OS=Homo sapiens GN=ACTN1 PE=1 SV=2 - [ACTN1\_HUMAN]  
 Vimentin OS=Homo sapiens GN=VIM PE=1 SV=4 - [VIME\_HUMAN]  
 Alpha-1-antichymotrypsin OS=Homo sapiens GN=SERPINA3 PE=1 SV=2 - [AACT\_HUMAN]  
 Glyceraldehyde-3-phosphate dehydrogenase OS=Homo sapiens GN=GAPDH PE=1 SV=3 - [G3P\_HUMAN]  
 Actin, alpha cardiac muscle 1 OS=Homo sapiens GN=ACTC1 PE=1 SV=1 - [ACTC\_HUMAN]  
 Histone H4 OS=Homo sapiens GN=HIST1H4A PE=1 SV=2 - [H4\_HUMAN]  
 Annexin A1 OS=Homo sapiens GN=ANXA1 PE=1 SV=2 - [ANXA1\_HUMAN]  
 Ig lambda-2 chain C regions OS=Homo sapiens GN=IGLC2 PE=1 SV=1 - [LAC2\_HUMAN]  
 Fibronectin OS=Homo sapiens GN=FN1 PE=1 SV=4 - [FINC\_HUMAN]  
 Transketolase OS=Homo sapiens GN=TKT PE=1 SV=3 - [TKT\_HUMAN]  
 Moesin OS=Homo sapiens GN=MSN PE=1 SV=3 - [MOES\_HUMAN]  
 Integrin alpha-M OS=Homo sapiens GN=ITGAM PE=1 SV=2 - [ITAM\_HUMAN]  
 Polymeric immunoglobulin receptor OS=Homo sapiens GN=PIGR PE=1 SV=4 - [PIGR\_HUMAN]  
 Annexin A6 OS=Homo sapiens GN=ANXA6 PE=1 SV=3 - [ANXA6\_HUMAN]  
 Cathepsin G OS=Homo sapiens GN=CTSG PE=1 SV=2 - [CATG\_HUMAN]  
 BPI fold-containing family A member 1 OS=Homo sapiens GN=BPIFA1 PE=1 SV=1 - [BPFA1\_HUMAN]  
 Alpha-actinin-4 OS=Homo sapiens GN=ACTN4 PE=1 SV=2 - [ACTN4\_HUMAN]  
 Annexin A3 OS=Homo sapiens GN=ANXA3 PE=1 SV=3 - [ANXA3\_HUMAN]  
 Heat shock cognate 71 kDa protein OS=Homo sapiens GN=HSPA8 PE=1 SV=1 - [HSP7C\_HUMAN]  
 Complement factor B OS=Homo sapiens GN=CFB PE=1 SV=2 - [CFAB\_HUMAN]  
 Heat shock 70 kDa protein 1A/1B OS=Homo sapiens GN=HSPA1A PE=1 SV=5 - [HSP71\_HUMAN]  
 Beta-actin-like protein 2 OS=Homo sapiens GN=ACTBL2 PE=1 SV=2 - [ACTBL\_HUMAN]  
 Catalase OS=Homo sapiens GN=CAT PE=1 SV=3 - [CATA\_HUMAN]  
 Glucose-6-phosphate isomerase OS=Homo sapiens GN=GPI PE=1 SV=4 - [G6PI\_HUMAN]

Matrix metalloproteinase-9 OS=Homo sapiens GN=MMP9 PE=1 SV=3 - [MMP9\_HUMAN]  
Neutrophil elastase OS=Homo sapiens GN=ELANE PE=1 SV=1 - [ELNE\_HUMAN]  
Phosphoglycerate kinase 1 OS=Homo sapiens GN=PGK1 PE=1 SV=3 - [PGK1\_HUMAN]  
78 kDa glucose-regulated protein OS=Homo sapiens GN=HSPA5 PE=1 SV=2 - [GRP78\_HUMAN]  
Actin, alpha skeletal muscle OS=Homo sapiens GN=ACTA1 PE=1 SV=1 - [ACTS\_HUMAN]  
Heat shock protein HSP 90-alpha OS=Homo sapiens GN=HSP90AA1 PE=1 SV=5 - [HS90A\_HUMAN]  
Heat shock protein HSP 90-beta OS=Homo sapiens GN=HSP90AB1 PE=1 SV=4 - [HS90B\_HUMAN]  
Heat shock 70 kDa protein 1-like OS=Homo sapiens GN=HSPA1L PE=1 SV=2 - [HS71L\_HUMAN]  
Bactericidal permeability-increasing protein OS=Homo sapiens GN=BPI PE=1 SV=4 - [BPI\_HUMAN]  
Ig kappa chain V-IV region (Fragment) OS=Homo sapiens GN=IGKV4-1 PE=4 SV=1 - [KV401\_HUMA]  
14-3-3 protein zeta/delta OS=Homo sapiens GN=YWHAZ PE=1 SV=1 - [1433Z\_HUMAN]  
Histone H2B type 1-D OS=Homo sapiens GN=HIST1H2BD PE=1 SV=2 - [H2B1D\_HUMAN]  
Tubulin beta chain OS=Homo sapiens GN=TUBB PE=1 SV=2 - [TBB5\_HUMAN]  
Tubulin alpha-1C chain OS=Homo sapiens GN=TUBA1C PE=1 SV=1 - [TBA1C\_HUMAN]  
Histone H2B type 1-O OS=Homo sapiens GN=HIST1H2BO PE=1 SV=3 - [H2B1O\_HUMAN]  
Myeloblastin OS=Homo sapiens GN=PRTN3 PE=1 SV=3 - [PRTN3\_HUMAN]  
Erythrocyte band 7 integral membrane protein OS=Homo sapiens GN=STOM PE=1 SV=3 - [STOM\_HU]  
Annexin A2 OS=Homo sapiens GN=ANXA2 PE=1 SV=2 - [ANXA2\_HUMAN]  
6-phosphogluconate dehydrogenase, decarboxylating OS=Homo sapiens GN=PGD PE=1 SV=3 - [6PGD\_  
L-lactate dehydrogenase A chain OS=Homo sapiens GN=LDHA PE=1 SV=2 - [LDHA\_HUMAN]  
Carbonic anhydrase 1 OS=Homo sapiens GN=CA1 PE=1 SV=2 - [CAH1\_HUMAN]  
Macrophage-capping protein OS=Homo sapiens GN=CAPG PE=1 SV=2 - [CAPG\_HUMAN]  
Ig kappa chain V-III region HIC OS=Homo sapiens PE=2 SV=2 - [KV313\_HUMAN]  
Ig kappa chain V-III region CLL OS=Homo sapiens PE=1 SV=2 - [KV308\_HUMAN]  
Fructose-bisphosphate aldolase A OS=Homo sapiens GN=ALDOA PE=1 SV=2 - [ALDOA\_HUMAN]  
Ras GTPase-activating-like protein IQGAP1 OS=Homo sapiens GN=IQGAP1 PE=1 SV=1 - [IQGA1\_HU  
Talin-1 OS=Homo sapiens GN=TLN1 PE=1 SV=3 - [TLN1\_HUMAN]  
Neutrophil gelatinase-associated lipocalin OS=Homo sapiens GN=LCN2 PE=1 SV=2 - [NGAL\_HUMAN]  
Profilin-1 OS=Homo sapiens GN=PFN1 PE=1 SV=2 - [PROF1\_HUMAN]  
Myeloid cell nuclear differentiation antigen OS=Homo sapiens GN=MNDA PE=1 SV=1 - [MNDA\_HUM  
Leukotriene A-4 hydrolase OS=Homo sapiens GN=LTA4H PE=1 SV=2 - [LKHA4\_HUMAN]  
Coronin-1A OS=Homo sapiens GN=CORO1A PE=1 SV=4 - [COR1A\_HUMAN]  
Protein disulfide-isomerase OS=Homo sapiens GN=P4HB PE=1 SV=3 - [PDIA1\_HUMAN]  
Elongation factor 1-alpha 1 OS=Homo sapiens GN=EEF1A1 PE=1 SV=1 - [EF1A1\_HUMAN]  
Endoplasmic reticulum protein OS=Homo sapiens GN=HSP90B1 PE=1 SV=1 - [ENPL\_HUMAN]  
Glycogen phosphorylase, liver form OS=Homo sapiens GN=PYGL PE=1 SV=4 - [PYGL\_HUMAN]  
Triosephosphate isomerase OS=Homo sapiens GN=TPI1 PE=1 SV=3 - [TPIS\_HUMAN]  
Annexin A5 OS=Homo sapiens GN=ANXA5 PE=1 SV=2 - [ANXA5\_HUMAN]  
Neutrophil collagenase OS=Homo sapiens GN=MMP8 PE=1 SV=1 - [MMP8\_HUMAN]  
Carcinoembryonic antigen-related cell adhesion molecule 6 OS=Homo sapiens GN=CEACAM6 PE=1 SV  
Rho GDP-dissociation inhibitor 2 OS=Homo sapiens GN=ARHGDIB PE=1 SV=3 - [GDIR2\_HUMAN]  
14-3-3 protein beta/alpha OS=Homo sapiens GN=YWHAB PE=1 SV=3 - [1433B\_HUMAN]  
Synaptic vesicle membrane protein VAT-1 homolog OS=Homo sapiens GN=VAT1 PE=1 SV=2 - [VAT1\_  
Azurocidin OS=Homo sapiens GN=AZU1 PE=1 SV=3 - [CAP7\_HUMAN]



Tubulin beta-4B chain OS=Homo sapiens GN=TUBB4B PE=1 SV=1 - [TBB4B\_HUMAN]  
 Ig kappa chain V-IV region Len OS=Homo sapiens PE=1 SV=2 - [KV402\_HUMAN]  
 Hexokinase-3 OS=Homo sapiens GN=HK3 PE=1 SV=2 - [HXK3\_HUMAN]  
 Guanine nucleotide-binding protein G(i) subunit alpha-2 OS=Homo sapiens GN=GNAI2 PE=1 SV=3 - [G  
 Brain acid soluble protein 1 OS=Homo sapiens GN=BASP1 PE=1 SV=2 - [BASP1\_HUMAN]  
 Cytochrome b-245 heavy chain OS=Homo sapiens GN=CYBB PE=1 SV=2 - [CY24B\_HUMAN]  
 Adenylyl cyclase-associated protein 1 OS=Homo sapiens GN=CAP1 PE=1 SV=5 - [CAP1\_HUMAN]  
 Hemoglobin subunit gamma-1 OS=Homo sapiens GN=HBG1 PE=1 SV=2 - [HBG1\_HUMAN]  
 Cofilin-1 OS=Homo sapiens GN=CFL1 PE=1 SV=3 - [COF1\_HUMAN]  
 Actin-related protein 2 OS=Homo sapiens GN=ACTR2 PE=1 SV=1 - [ARP2\_HUMAN]  
 Glucose-6-phosphate 1-dehydrogenase OS=Homo sapiens GN=G6PD PE=1 SV=4 - [G6PD\_HUMAN]  
 IgGfC-binding protein OS=Homo sapiens GN=FCGBP PE=1 SV=3 - [FCGBP\_HUMAN]  
 Glutathione S-transferase P OS=Homo sapiens GN=GSTP1 PE=1 SV=2 - [GSTP1\_HUMAN]  
 Actin-related protein 3 OS=Homo sapiens GN=ACTR3 PE=1 SV=3 - [ARP3\_HUMAN]  
 Ubiquitin-like modifier-activating enzyme 1 OS=Homo sapiens GN=UBA1 PE=1 SV=3 - [UBA1\_HUMA  
 Vinculin OS=Homo sapiens GN=VCL PE=1 SV=4 - [VINC\_HUMAN]  
 Protein disulfide-isomerase A3 OS=Homo sapiens GN=PDIA3 PE=1 SV=4 - [PDIA3\_HUMAN]  
 Phosphoglycerate mutase 1 OS=Homo sapiens GN=PGAM1 PE=1 SV=2 - [PGAM1\_HUMAN]  
 Clathrin heavy chain 1 OS=Homo sapiens GN=CLTC PE=1 SV=5 - [CLH1\_HUMAN]  
 Histone H2A type 2-C OS=Homo sapiens GN=HIST2H2AC PE=1 SV=4 - [H2A2C\_HUMAN]  
 Integrin beta-2 OS=Homo sapiens GN=ITGB2 PE=1 SV=2 - [ITB2\_HUMAN]  
 Grancalcin OS=Homo sapiens GN=GCA PE=1 SV=2 - [GRAN\_HUMAN]  
 Nicotinamide phosphoribosyltransferase OS=Homo sapiens GN=NAMPT PE=1 SV=1 - [NAMPT\_HUM  
 Histone H2A type 1-H OS=Homo sapiens GN=HIST1H2AH PE=1 SV=3 - [H2A1H\_HUMAN]  
 Carcinoembryonic antigen-related cell adhesion molecule 8 OS=Homo sapiens GN=CEACAM8 PE=1 SV  
 Transaldolase OS=Homo sapiens GN=TALDO1 PE=1 SV=2 - [TALDO\_HUMAN]  
 Ig heavy chain V-III region GAL OS=Homo sapiens PE=1 SV=1 - [HV320\_HUMAN]  
 Receptor-type tyrosine-protein phosphatase C OS=Homo sapiens GN=PTPRC PE=1 SV=2 - [PTPRC\_HU  
 Histone H2B type 1-K OS=Homo sapiens GN=HIST1H2BK PE=1 SV=3 - [H2B1K\_HUMAN]  
 Olfactomedin-4 OS=Homo sapiens GN=OLFM4 PE=1 SV=1 - [OLFM4\_HUMAN]  
 Ig lambda chain V-III region LOI OS=Homo sapiens PE=1 SV=1 - [LV302\_HUMAN]  
 Histone H2B type 1-J OS=Homo sapiens GN=HIST1H2BJ PE=1 SV=3 - [H2B1J\_HUMAN]  
 Actin-related protein 2/3 complex subunit 2 OS=Homo sapiens GN=ARPC2 PE=1 SV=1 - [ARPC2\_HUM  
 Lysozyme C OS=Homo sapiens GN=LYZ PE=1 SV=1 - [LYSC\_HUMAN]  
 Tropomyosin alpha-3 chain OS=Homo sapiens GN=TPM3 PE=1 SV=2 - [TPM3\_HUMAN]  
 ATP synthase subunit beta, mitochondrial OS=Homo sapiens GN=ATP5B PE=1 SV=3 - [ATPB\_HUMAN  
 Vitronectin OS=Homo sapiens GN=VTN PE=1 SV=1 - [VTNC\_HUMAN]  
 Lumican OS=Homo sapiens GN=LUM PE=1 SV=2 - [LUM\_HUMAN]  
 Rab GDP dissociation inhibitor beta OS=Homo sapiens GN=GDI2 PE=1 SV=2 - [GDIB\_HUMAN]  
 Fermitin family homolog 3 OS=Homo sapiens GN=FERMT3 PE=1 SV=1 - [URP2\_HUMAN]  
 Chitinase-3-like protein 1 OS=Homo sapiens GN=CHI3L1 PE=1 SV=2 - [CH3L1\_HUMAN]  
 Ig heavy chain V-III region BRO OS=Homo sapiens PE=1 SV=1 - [HV305\_HUMAN]  
 Deleted in malignant brain tumors 1 protein OS=Homo sapiens GN=DMBT1 PE=1 SV=2 - [DMBT1\_HU  
 Calnexin OS=Homo sapiens GN=CANX PE=1 SV=2 - [CALX\_HUMAN]

Tubulin alpha-4A chain OS=Homo sapiens GN=TUBA4A PE=1 SV=1 - [TBA4A\_HUMAN]  
 14-3-3 protein epsilon OS=Homo sapiens GN=YWHAE PE=1 SV=1 - [1433E\_HUMAN]  
 Ras-related protein Rab-7a OS=Homo sapiens GN=RAB7A PE=1 SV=1 - [RAB7A\_HUMAN]  
 Keratin, type I cytoskeletal 14 OS=Homo sapiens GN=KRT14 PE=1 SV=4 - [K1C14\_HUMAN]  
 Myosin regulatory light chain 12A OS=Homo sapiens GN=MYL12A PE=1 SV=2 - [ML12A\_HUMAN]  
 Corticosteroid-binding globulin OS=Homo sapiens GN=SERPINA6 PE=1 SV=1 - [CBG\_HUMAN]  
 Keratin, type II cuticular Hb3 OS=Homo sapiens GN=KRT83 PE=1 SV=2 - [KRT83\_HUMAN]  
 Keratin, type I cuticular Ha1 OS=Homo sapiens GN=KRT31 PE=2 SV=3 - [K1H1\_HUMAN]  
 Annexin A4 OS=Homo sapiens GN=ANXA4 PE=1 SV=4 - [ANXA4\_HUMAN]  
 Tubulin beta-2A chain OS=Homo sapiens GN=TUBB2A PE=1 SV=1 - [TBB2A\_HUMAN]  
 Protein-arginine deiminase type-4 OS=Homo sapiens GN=PADI4 PE=1 SV=2 - [PADI4\_HUMAN]  
 L-lactate dehydrogenase B chain OS=Homo sapiens GN=LDHB PE=1 SV=2 - [LDHB\_HUMAN]  
 Histone H2A.x OS=Homo sapiens GN=H2AFX PE=1 SV=2 - [H2AX\_HUMAN]  
 Calreticulin OS=Homo sapiens GN=CALR PE=1 SV=1 - [CALR\_HUMAN]  
 Actin-related protein 2/3 complex subunit 1B OS=Homo sapiens GN=ARPC1B PE=1 SV=3 - [ARC1B\_HUMAN]  
 Tropomyosin alpha-4 chain OS=Homo sapiens GN=TPM4 PE=1 SV=3 - [TPM4\_HUMAN]  
 Ras-related C3 botulinum toxin substrate 2 OS=Homo sapiens GN=RAC2 PE=1 SV=1 - [RAC2\_HUMAN]  
 Actin-related protein 2/3 complex subunit 3 OS=Homo sapiens GN=ARPC3 PE=1 SV=3 - [ARPC3\_HUMAN]  
 Chloride intracellular channel protein 1 OS=Homo sapiens GN=CLIC1 PE=1 SV=4 - [CLIC1\_HUMAN]  
 F-actin-capping protein subunit alpha-1 OS=Homo sapiens GN=CAPZA1 PE=1 SV=3 - [CAZA1\_HUMAN]  
 Ig delta chain C region OS=Homo sapiens GN=IGHD PE=1 SV=2 - [IGHD\_HUMAN]  
 WD repeat-containing protein 1 OS=Homo sapiens GN=WDR1 PE=1 SV=4 - [WDR1\_HUMAN]  
 Spectrin alpha chain, non-erythrocytic 1 OS=Homo sapiens GN=SPTAN1 PE=1 SV=3 - [SPTN1\_HUMAN]  
 Protein S100-A8 OS=Homo sapiens GN=S100A8 PE=1 SV=1 - [S10A8\_HUMAN]  
 Apolipoprotein A-IV OS=Homo sapiens GN=APOA4 PE=1 SV=3 - [APOA4\_HUMAN]  
 Calmodulin OS=Homo sapiens GN=CALM1 PE=1 SV=2 - [CALM\_HUMAN]  
 Keratin, type II cytoskeletal 6A OS=Homo sapiens GN=KRT6A PE=1 SV=3 - [K2C6A\_HUMAN]  
 Adipocyte plasma membrane-associated protein OS=Homo sapiens GN=APMAP PE=1 SV=2 - [APMAP\_HUMAN]  
 Myosin light polypeptide 6 OS=Homo sapiens GN=MYL6 PE=1 SV=2 - [MYL6\_HUMAN]  
 Superoxide dismutase [Mn], mitochondrial OS=Homo sapiens GN=SOD2 PE=1 SV=2 - [SODM\_HUMAN]  
 Thymidine phosphorylase OS=Homo sapiens GN=TYMP PE=1 SV=2 - [TYPH\_HUMAN]  
 14-3-3 protein gamma OS=Homo sapiens GN=YWHAG PE=1 SV=2 - [1433G\_HUMAN]  
 ATP synthase subunit alpha, mitochondrial OS=Homo sapiens GN=ATP5A1 PE=1 SV=1 - [ATPA\_HUMAN]  
 Keratin, type II cuticular Hb5 OS=Homo sapiens GN=KRT85 PE=1 SV=1 - [KRT85\_HUMAN]  
 Keratin, type II cuticular Hb1 OS=Homo sapiens GN=KRT81 PE=1 SV=3 - [KRT81\_HUMAN]  
 Keratin, type II cuticular Hb6 OS=Homo sapiens GN=KRT86 PE=1 SV=1 - [KRT86\_HUMAN]  
 Ferritin light chain OS=Homo sapiens GN=FTL PE=1 SV=2 - [FRIL\_HUMAN]  
 Protein FAM49B OS=Homo sapiens GN=FAM49B PE=1 SV=1 - [FA49B\_HUMAN]  
 Annexin A11 OS=Homo sapiens GN=ANXA11 PE=1 SV=1 - [ANX11\_HUMAN]  
 Carcinoembryonic antigen-related cell adhesion molecule 1 OS=Homo sapiens GN=CEACAM1 PE=1 SV=1 - [CEACAM1\_HUMAN]  
 Ras-related protein Rab-10 OS=Homo sapiens GN=RAB10 PE=1 SV=1 - [RAB10\_HUMAN]  
 Transitional endoplasmic reticulum ATPase OS=Homo sapiens GN=VCP PE=1 SV=4 - [TERA\_HUMAN]  
 Keratin, type I cuticular Ha3-I OS=Homo sapiens GN=KRT33A PE=2 SV=2 - [KT33A\_HUMAN]  
 Ezrin OS=Homo sapiens GN=EZR PE=1 SV=4 - [EZRI\_HUMAN]

Receptor-type tyrosine-protein phosphatase eta OS=Homo sapiens GN=PTPRJ PE=1 SV=3 - [PTPRJ\_HUMAN]  
 Cathelicidin antimicrobial peptide OS=Homo sapiens GN=CAMP PE=1 SV=1 - [CAMP\_HUMAN]  
 Keratin, type I cuticular Ha3-II OS=Homo sapiens GN=KRT33B PE=2 SV=3 - [KT33B\_HUMAN]  
 Rho GDP-dissociation inhibitor 1 OS=Homo sapiens GN=ARHGDI1 PE=1 SV=3 - [GDIR1\_HUMAN]  
 Transcobalamin-1 OS=Homo sapiens GN=TCN1 PE=1 SV=2 - [TCO1\_HUMAN]  
 Myristoylated alanine-rich C-kinase substrate OS=Homo sapiens GN=MARCKS PE=1 SV=4 - [MARCS\_HUMAN]  
 Peroxiredoxin-5, mitochondrial OS=Homo sapiens GN=PRDX5 PE=1 SV=4 - [PRDX5\_HUMAN]  
 Polyubiquitin-C OS=Homo sapiens GN=UBC PE=1 SV=3 - [UBC\_HUMAN]  
 Galectin-3 OS=Homo sapiens GN=LGALS3 PE=1 SV=5 - [LEG3\_HUMAN]  
 14-3-3 protein theta OS=Homo sapiens GN=YWHAQ PE=1 SV=1 - [1433T\_HUMAN]  
 14-3-3 protein eta OS=Homo sapiens GN=YWHAH PE=1 SV=4 - [1433F\_HUMAN]  
 Keratin, type II cytoskeletal 1b OS=Homo sapiens GN=KRT77 PE=2 SV=3 - [K2C1B\_HUMAN]  
 Ferritin heavy chain OS=Homo sapiens GN=FTH1 PE=1 SV=2 - [FRIH\_HUMAN]  
 Protein S100-A12 OS=Homo sapiens GN=S100A12 PE=1 SV=2 - [S10AC\_HUMAN]  
 F-actin-capping protein subunit beta OS=Homo sapiens GN=CAPZB PE=1 SV=4 - [CAPZB\_HUMAN]  
 Putative tropomyosin alpha-3 chain-like protein OS=Homo sapiens PE=5 SV=2 - [TPM3L\_HUMAN]  
 Purine nucleoside phosphorylase OS=Homo sapiens GN=PNP PE=1 SV=2 - [PNPH\_HUMAN]  
 Peptidyl-prolyl cis-trans isomerase B OS=Homo sapiens GN=PPIB PE=1 SV=2 - [PPIB\_HUMAN]  
 Transgelin-2 OS=Homo sapiens GN=TAGLN2 PE=1 SV=3 - [TAGL2\_HUMAN]  
 Lamin-B1 OS=Homo sapiens GN=LMNB1 PE=1 SV=2 - [LMNB1\_HUMAN]  
 Integrin alpha-X OS=Homo sapiens GN=ITGAX PE=1 SV=3 - [ITAX\_HUMAN]  
 Radixin OS=Homo sapiens GN=RDX PE=1 SV=1 - [RADI\_HUMAN]  
 Neutral alpha-glucosidase AB OS=Homo sapiens GN=GANAB PE=1 SV=3 - [GANAB\_HUMAN]  
 Cathepsin D OS=Homo sapiens GN=CTSD PE=1 SV=1 - [CATD\_HUMAN]  
 Fructose-1,6-bisphosphatase 1 OS=Homo sapiens GN=FBP1 PE=1 SV=5 - [F16P1\_HUMAN]  
 Core histone macro-H2A.1 OS=Homo sapiens GN=H2AFY PE=1 SV=4 - [H2AY\_HUMAN]  
 Histone H2A.Z OS=Homo sapiens GN=H2AFZ PE=1 SV=2 - [H2AZ\_HUMAN]  
 Tryptophan--tRNA ligase, cytoplasmic OS=Homo sapiens GN=WARS PE=1 SV=2 - [SYWC\_HUMAN]  
 Eosinophil cationic protein OS=Homo sapiens GN=RNASE3 PE=1 SV=2 - [ECP\_HUMAN]  
 Heterogeneous nuclear ribonucleoproteins A2/B1 OS=Homo sapiens GN=HNRNPA2B1 PE=1 SV=2 - [R\_HUMAN]  
 Peptidyl-prolyl cis-trans isomerase A OS=Homo sapiens GN=PPIA PE=1 SV=2 - [PPIA\_HUMAN]  
 Keratin, type I cuticular Ha4 OS=Homo sapiens GN=KRT34 PE=2 SV=2 - [KRT34\_HUMAN]  
 Neutrophil cytosol factor 1 OS=Homo sapiens GN=NCF1 PE=1 SV=3 - [NCF1\_HUMAN]  
 Unconventional myosin-1f OS=Homo sapiens GN=MYO1F PE=1 SV=3 - [MYO1F\_HUMAN]  
 Transferrin receptor protein 1 OS=Homo sapiens GN=TFRC PE=1 SV=2 - [TFR1\_HUMAN]  
 Protein disulfide-isomerase A4 OS=Homo sapiens GN=PDIA4 PE=1 SV=2 - [PDIA4\_HUMAN]  
 Chitotriosidase-1 OS=Homo sapiens GN=CHIT1 PE=1 SV=1 - [CHIT1\_HUMAN]  
 Protein disulfide-isomerase A6 OS=Homo sapiens GN=PDIA6 PE=1 SV=1 - [PDIA6\_HUMAN]  
 ADP-ribosylation factor 3 OS=Homo sapiens GN=ARF3 PE=1 SV=2 - [ARF3\_HUMAN]  
 Ig lambda chain V-I region WAH OS=Homo sapiens PE=1 SV=1 - [LV106\_HUMAN]  
 Isocitrate dehydrogenase [NADP] cytoplasmic OS=Homo sapiens GN=IDH1 PE=1 SV=2 - [IDHC\_HUMAN]  
 High mobility group protein B2 OS=Homo sapiens GN=HMGB2 PE=1 SV=2 - [HMGB2\_HUMAN]  
 Plasminogen OS=Homo sapiens GN=PLG PE=1 SV=2 - [PLMN\_HUMAN]  
 Vasodilator-stimulated phosphoprotein OS=Homo sapiens GN=VASP PE=1 SV=3 - [VASP\_HUMAN]

Rho GTPase-activating protein 1 OS=Homo sapiens GN=ARHGAP1 PE=1 SV=1 - [RHG01\_HUMAN]  
Heterogeneous nuclear ribonucleoprotein K OS=Homo sapiens GN=HNRNPK PE=1 SV=1 - [HNRPK\_HUMAN]  
Malate dehydrogenase, cytoplasmic OS=Homo sapiens GN=MDH1 PE=1 SV=4 - [MDHC\_HUMAN]  
Afamin OS=Homo sapiens GN=AFM PE=1 SV=1 - [AFAM\_HUMAN]  
Complement component C7 OS=Homo sapiens GN=C7 PE=1 SV=2 - [CO7\_HUMAN]  
Nucleoside diphosphate kinase B OS=Homo sapiens GN=NME2 PE=1 SV=1 - [NDKB\_HUMAN]  
Rab GDP dissociation inhibitor alpha OS=Homo sapiens GN=GDI1 PE=1 SV=2 - [GDIA\_HUMAN]  
Tyrosine-protein phosphatase non-receptor type substrate 1 OS=Homo sapiens GN=SIRPA PE=1 SV=2 - [PLECTIN\_HUMAN]  
Plectin OS=Homo sapiens GN=PLEC PE=1 SV=3 - [PLEC\_HUMAN]  
Histone H3.1 OS=Homo sapiens GN=HIST1H3A PE=1 SV=2 - [H31\_HUMAN]  
Phospholipid transfer protein OS=Homo sapiens GN=PLTP PE=1 SV=1 - [PLTP\_HUMAN]  
Ig kappa chain V-I region Roy OS=Homo sapiens PE=1 SV=1 - [KV116\_HUMAN]  
Spectrin beta chain, non-erythrocytic 1 OS=Homo sapiens GN=SPTBN1 PE=1 SV=2 - [SPTB2\_HUMAN]  
UTP--glucose-1-phosphate uridylyltransferase OS=Homo sapiens GN=UGP2 PE=1 SV=5 - [UGPA\_HUMAN]  
Ras-related protein Rab-27A OS=Homo sapiens GN=RAB27A PE=1 SV=3 - [RB27A\_HUMAN]  
GTP-binding nuclear protein Ran OS=Homo sapiens GN=RAN PE=1 SV=3 - [RAN\_HUMAN]  
Cystatin-B OS=Homo sapiens GN=CSTB PE=1 SV=2 - [CYTB\_HUMAN]  
Complement C5 OS=Homo sapiens GN=C5 PE=1 SV=4 - [CO5\_HUMAN]  
Serpins B3 OS=Homo sapiens GN=SERPINB3 PE=1 SV=2 - [SPB3\_HUMAN]  
Heterogeneous nuclear ribonucleoprotein H OS=Homo sapiens GN=HNRNPH1 PE=1 SV=4 - [HNRH1\_HUMAN]  
Malate dehydrogenase, mitochondrial OS=Homo sapiens GN=MDH2 PE=1 SV=3 - [MDHM\_HUMAN]  
Transforming protein RhoA OS=Homo sapiens GN=RHOA PE=1 SV=1 - [RHOA\_HUMAN]  
Ras-related protein Rap-1b OS=Homo sapiens GN=RAP1B PE=1 SV=1 - [RAP1B\_HUMAN]  
Aminopeptidase N OS=Homo sapiens GN=ANPEP PE=1 SV=4 - [AMPN\_HUMAN]  
Peroxiredoxin-6 OS=Homo sapiens GN=PRDX6 PE=1 SV=3 - [PRDX6\_HUMAN]  
Nucleophosmin OS=Homo sapiens GN=NPM1 PE=1 SV=2 - [NPM\_HUMAN]  
Elongation factor 1-gamma OS=Homo sapiens GN=EEF1G PE=1 SV=3 - [EF1G\_HUMAN]  
Ras-related protein Rab-1A OS=Homo sapiens GN=RAB1A PE=1 SV=3 - [RAB1A\_HUMAN]  
Keratin, type I cuticular Ha2 OS=Homo sapiens GN=KRT32 PE=1 SV=3 - [K1H2\_HUMAN]  
Ras-related protein Rab-11B OS=Homo sapiens GN=RAB11B PE=1 SV=4 - [RB11B\_HUMAN]  
Proteasome subunit alpha type-7 OS=Homo sapiens GN=PSMA7 PE=1 SV=1 - [PSA7\_HUMAN]  
Peroxiredoxin-1 OS=Homo sapiens GN=PRDX1 PE=1 SV=1 - [PRDX1\_HUMAN]  
Histone H1.5 OS=Homo sapiens GN=HIST1H1B PE=1 SV=3 - [H15\_HUMAN]  
Ficolin-1 OS=Homo sapiens GN=FCN1 PE=1 SV=2 - [FCN1\_HUMAN]  
Histone H1.4 OS=Homo sapiens GN=HIST1H1E PE=1 SV=2 - [H14\_HUMAN]  
Serpins B9 OS=Homo sapiens GN=SERPINB9 PE=1 SV=1 - [SPB9\_HUMAN]  
Proteasome subunit alpha type-6 OS=Homo sapiens GN=PSMA6 PE=1 SV=1 - [PSA6\_HUMAN]  
Ras-related protein Rab-2A OS=Homo sapiens GN=RAB2A PE=1 SV=1 - [RAB2A\_HUMAN]  
Protein S100-A11 OS=Homo sapiens GN=S100A11 PE=1 SV=2 - [S10AB\_HUMAN]  
Calpain-1 catalytic subunit OS=Homo sapiens GN=CAPN1 PE=1 SV=1 - [CAN1\_HUMAN]  
Cell division control protein 42 homolog OS=Homo sapiens GN=CDC42 PE=1 SV=2 - [CDC42\_HUMAN]  
Ras-related protein Rab-14 OS=Homo sapiens GN=RAB14 PE=1 SV=4 - [RAB14\_HUMAN]  
Pyridoxal kinase OS=Homo sapiens GN=PDCK1 PE=1 SV=1 - [PDCK1\_HUMAN]  
Intercellular adhesion molecule 3 OS=Homo sapiens GN=ICAM3 PE=1 SV=2 - [ICAM3\_HUMAN]

Adenylate kinase 2, mitochondrial OS=Homo sapiens GN=AK2 PE=1 SV=2 - [KAD2\_HUMAN]  
 Vacuolar protein sorting-associated protein 35 OS=Homo sapiens GN=VPS35 PE=1 SV=2 - [VPS35\_HUMAN]  
 Serpin B10 OS=Homo sapiens GN=SERPINB10 PE=1 SV=1 - [SPB10\_HUMAN]  
 Actin-related protein 2/3 complex subunit 4 OS=Homo sapiens GN=ARPC4 PE=1 SV=3 - [ARPC4\_HUMAN]  
 Ig lambda chain V-III region SH OS=Homo sapiens PE=1 SV=1 - [LV301\_HUMAN]  
 Ig lambda chain V-VI region AR OS=Homo sapiens PE=1 SV=1 - [LV601\_HUMAN]  
 Copine-3 OS=Homo sapiens GN=CPNE3 PE=1 SV=1 - [CPNE3\_HUMAN]  
 ADP/ATP translocase 2 OS=Homo sapiens GN=SLC25A5 PE=1 SV=7 - [ADT2\_HUMAN]  
 Non-secretory ribonuclease OS=Homo sapiens GN=RNASE2 PE=1 SV=2 - [RNASE2\_HUMAN]  
 Keratin, type I cytoskeletal 13 OS=Homo sapiens GN=KRT13 PE=1 SV=4 - [K1C13\_HUMAN]  
 Protein S100-A4 OS=Homo sapiens GN=S100A4 PE=1 SV=1 - [S10A4\_HUMAN]  
 BTB/POZ domain-containing protein KCTD12 OS=Homo sapiens GN=KCTD12 PE=1 SV=1 - [KCD12\_HUMAN]  
 Protein DJ-1 OS=Homo sapiens GN=PARK7 PE=1 SV=2 - [PARK7\_HUMAN]  
 Heterogeneous nuclear ribonucleoproteins C1/C2 OS=Homo sapiens GN=HNRNPC PE=1 SV=4 - [HNRI\_HUMAN]  
 Ribonuclease inhibitor OS=Homo sapiens GN=RNH1 PE=1 SV=2 - [RINI\_HUMAN]  
 C4b-binding protein alpha chain OS=Homo sapiens GN=C4BPA PE=1 SV=2 - [C4BPA\_HUMAN]  
 Maltase-glucoamylase, intestinal OS=Homo sapiens GN=MGAM PE=1 SV=5 - [MGA\_HUMAN]  
 Protein-L-isoaspartate(D-aspartate) O-methyltransferase OS=Homo sapiens GN=PCMT1 PE=1 SV=4 - [P\_HUMAN]  
 Tyrosine-protein phosphatase non-receptor type 6 OS=Homo sapiens GN=PTPN6 PE=1 SV=1 - [PTN6\_HUMAN]  
 Ras-related C3 botulinum toxin substrate 1 OS=Homo sapiens GN=RAC1 PE=1 SV=1 - [RAC1\_HUMAN]  
 Acid ceramidase OS=Homo sapiens GN=ASAH1 PE=1 SV=5 - [ASAH1\_HUMAN]  
 Keratin, type I cuticular Ha5 OS=Homo sapiens GN=KRT35 PE=2 SV=5 - [KRT35\_HUMAN]  
 Ras-related protein Rab-1B OS=Homo sapiens GN=RAB1B PE=1 SV=1 - [RAB1B\_HUMAN]  
 EH domain-containing protein 1 OS=Homo sapiens GN=EHD1 PE=1 SV=2 - [EHD1\_HUMAN]  
 Actin-related protein 2/3 complex subunit 5 OS=Homo sapiens GN=ARPC5 PE=1 SV=3 - [ARPC5\_HUMAN]  
 Ras-related protein Rab-5C OS=Homo sapiens GN=RAB5C PE=1 SV=2 - [RAB5C\_HUMAN]  
 N-acetyl-D-glucosamine kinase OS=Homo sapiens GN=NAGK PE=1 SV=4 - [NAGK\_HUMAN]  
 Ig kappa chain V-I region Ni OS=Homo sapiens PE=1 SV=1 - [KV121\_HUMAN]  
 Ig heavy chain V-I region HG3 OS=Homo sapiens PE=4 SV=1 - [HV102\_HUMAN]  
 Heterogeneous nuclear ribonucleoprotein A1 OS=Homo sapiens GN=HNRNPA1 PE=1 SV=5 - [ROA1\_HUMAN]  
 Arachidonate 5-lipoxygenase OS=Homo sapiens GN=ALOX5 PE=1 SV=2 - [LOX5\_HUMAN]  
 Voltage-dependent anion-selective channel protein 1 OS=Homo sapiens GN=VDAC1 PE=1 SV=2 - [VDAC1\_HUMAN]  
 V-type proton ATPase catalytic subunit A OS=Homo sapiens GN=ATP6V1A PE=1 SV=2 - [VATA\_HUMAN]  
 Growth factor receptor-bound protein 2 OS=Homo sapiens GN=GRB2 PE=1 SV=1 - [GRB2\_HUMAN]  
 Nicastrin OS=Homo sapiens GN=NCSTN PE=1 SV=2 - [NICA\_HUMAN]  
 Drebrin-like protein OS=Homo sapiens GN=DBNL PE=1 SV=1 - [DBNL\_HUMAN]  
 Nucleoside diphosphate kinase A OS=Homo sapiens GN=NME1 PE=1 SV=1 - [NDKA\_HUMAN]  
 Rho-related GTP-binding protein RhoG OS=Homo sapiens GN=RHOG PE=1 SV=1 - [RHOG\_HUMAN]  
 Ig kappa chain V-I region Wes OS=Homo sapiens PE=1 SV=1 - [KV119\_HUMAN]  
 Beta-hexosaminidase subunit beta OS=Homo sapiens GN=HEXB PE=1 SV=3 - [HEXB\_HUMAN]  
 Fructose-bisphosphate aldolase C OS=Homo sapiens GN=ALDOC PE=1 SV=2 - [ALDOC\_HUMAN]  
 HLA class I histocompatibility antigen, A-33 alpha chain OS=Homo sapiens GN=HLA-A PE=2 SV=3 - [HLA\_A33\_HUMAN]  
 ADP-ribosylation factor 4 OS=Homo sapiens GN=ARF4 PE=1 SV=3 - [ARF4\_HUMAN]  
 Neutrophil cytosol factor 2 OS=Homo sapiens GN=NCF2 PE=1 SV=2 - [NCF2\_HUMAN]

HLA class I histocompatibility antigen, B-15 alpha chain OS=Homo sapiens GN=HLA-B PE=1 SV=2 - [I  
 Transmembrane emp24 domain-containing protein 10 OS=Homo sapiens GN=TMED10 PE=1 SV=2 - [T  
 ADP-ribosyl cyclase 2 OS=Homo sapiens GN=BST1 PE=1 SV=2 - [BST1\_HUMAN]  
 Apoptosis-associated speck-like protein containing a CARD OS=Homo sapiens GN=PYCARD PE=1 SV=  
 Arginase-1 OS=Homo sapiens GN=ARG1 PE=1 SV=2 - [ARG1\_HUMAN]  
 SH3 domain-binding glutamic acid-rich-like protein 3 OS=Homo sapiens GN=SH3BGRL3 PE=1 SV=1 -  
 Coactosin-like protein OS=Homo sapiens GN=COTL1 PE=1 SV=3 - [COTL1\_HUMAN]  
 EF-hand domain-containing protein D2 OS=Homo sapiens GN=EFHD2 PE=1 SV=1 - [EFHD2\_HUMAN]  
 Keratin, type II cytoskeletal 7 OS=Homo sapiens GN=KRT7 PE=1 SV=5 - [K2C7\_HUMAN]  
 HLA class I histocompatibility antigen, A-30 alpha chain OS=Homo sapiens GN=HLA-A PE=2 SV=2 - [I  
 HLA class I histocompatibility antigen, B-8 alpha chain OS=Homo sapiens GN=HLA-B PE=1 SV=1 - [I  
 Dihydropyrimidinase-related protein 2 OS=Homo sapiens GN=DPYSL2 PE=1 SV=1 - [DPYL2\_HUMAN]  
 Twinfilin-2 OS=Homo sapiens GN=TFW2 PE=1 SV=2 - [TFW2\_HUMAN]  
 Phosphatidylethanolamine-binding protein 1 OS=Homo sapiens GN=PEBP1 PE=1 SV=3 - [PEBP1\_HUM  
 Neutrophil cytosol factor 4 OS=Homo sapiens GN=NCF4 PE=1 SV=2 - [NCF4\_HUMAN]  
 Tubulin-specific chaperone A OS=Homo sapiens GN=TBCA PE=1 SV=3 - [TBCA\_HUMAN]  
 Ras-related protein Rab-8B OS=Homo sapiens GN=RAB8B PE=1 SV=2 - [RAB8B\_HUMAN]  
 Complement component C6 OS=Homo sapiens GN=C6 PE=1 SV=3 - [CO6\_HUMAN]  
 Filamin-B OS=Homo sapiens GN=FLNB PE=1 SV=2 - [FLNB\_HUMAN]  
 ADP/ATP translocase 3 OS=Homo sapiens GN=SLC25A6 PE=1 SV=4 - [ADT3\_HUMAN]  
 Hexokinase-1 OS=Homo sapiens GN=HK1 PE=1 SV=3 - [HXK1\_HUMAN]  
 Proteasome subunit beta type-1 OS=Homo sapiens GN=PSMB1 PE=1 SV=2 - [PSB1\_HUMAN]  
 Proteasome subunit alpha type-1 OS=Homo sapiens GN=PSMA1 PE=1 SV=1 - [PSA1\_HUMAN]  
 T-complex protein 1 subunit theta OS=Homo sapiens GN=CCT8 PE=1 SV=4 - [TCPQ\_HUMAN]  
 Phospholipase B-like 1 OS=Homo sapiens GN=PLBD1 PE=1 SV=2 - [PLBL1\_HUMAN]  
 Ras-related protein Rab-11A OS=Homo sapiens GN=RAB11A PE=1 SV=3 - [RB11A\_HUMAN]  
 Tenascin OS=Homo sapiens GN=TNC PE=1 SV=3 - [TENA\_HUMAN]  
 SH3 domain-binding glutamic acid-rich-like protein OS=Homo sapiens GN=SH3BGRL PE=1 SV=1 - [SI  
 HLA class I histocompatibility antigen, B-7 alpha chain OS=Homo sapiens GN=HLA-B PE=1 SV=3 - [I  
 HLA class II histocompatibility antigen, DR alpha chain OS=Homo sapiens GN=HLA-DRA PE=1 SV=1  
 Ras-related protein Ral-B OS=Homo sapiens GN=RALB PE=1 SV=1 - [RALB\_HUMAN]  
 Prolactin-inducible protein OS=Homo sapiens GN=PIP PE=1 SV=1 - [PIP\_HUMAN]  
 Cytochrome b-245 light chain OS=Homo sapiens GN=CYBA PE=1 SV=3 - [CY24A\_HUMAN]  
 Keratin, type II cytoskeletal 4 OS=Homo sapiens GN=KRT4 PE=1 SV=4 - [K2C4\_HUMAN]  
 Adenosylhomocysteinase OS=Homo sapiens GN=AHCY PE=1 SV=4 - [SAHH\_HUMAN]  
 DNA-(apurinic or apyrimidinic site) lyase OS=Homo sapiens GN=APEX1 PE=1 SV=2 - [APEX1\_HUMA  
 Endoplasmic reticulum resident protein 29 OS=Homo sapiens GN=ERP29 PE=1 SV=4 - [ERP29\_HUMA  
 Thioredoxin-dependent peroxide reductase, mitochondrial OS=Homo sapiens GN=PRDX3 PE=1 SV=3 - |  
 Dolichyl-diphosphooligosaccharide--protein glycosyltransferase 48 kDa subunit OS=Homo sapiens GN=I  
 Heterogeneous nuclear ribonucleoprotein F OS=Homo sapiens GN=HNRNPF PE=1 SV=3 - [HNRPF\_HU  
 Translin OS=Homo sapiens GN=TSN PE=1 SV=1 - [TSN\_HUMAN]  
 3-hydroxyacyl-CoA dehydrogenase type-2 OS=Homo sapiens GN=HSD17B10 PE=1 SV=3 - [HCD2\_HU  
 Calcineurin-like phosphoesterase domain-containing protein 1 OS=Homo sapiens GN=CPPED1 PE=1 SV  
 Prominin-1 OS=Homo sapiens GN=PROM1 PE=1 SV=1 - [PROM1\_HUMAN]

Glia maturation factor gamma OS=Homo sapiens GN=GMFG PE=1 SV=1 - [GMFG\_HUMAN]  
 Glutathione reductase, mitochondrial OS=Homo sapiens GN=GSR PE=1 SV=2 - [GSHR\_HUMAN]  
 Cytochrome c oxidase subunit 2 OS=Homo sapiens GN=MT-CO2 PE=1 SV=1 - [COX2\_HUMAN]  
 Ig kappa chain V-III region VH (Fragment) OS=Homo sapiens PE=4 SV=1 - [KV310\_HUMAN]  
 Adenine phosphoribosyltransferase OS=Homo sapiens GN=APRT PE=1 SV=2 - [APT\_HUMAN]  
 Pleckstrin OS=Homo sapiens GN=PLEK PE=1 SV=3 - [PLEK\_HUMAN]  
 Guanine nucleotide-binding protein G(k) subunit alpha OS=Homo sapiens GN=GNAI3 PE=1 SV=3 - [GN  
 Lysosome-associated membrane glycoprotein 1 OS=Homo sapiens GN=LAMP1 PE=1 SV=3 - [LAMP1\_  
 Serpin B6 OS=Homo sapiens GN=SERPINB6 PE=1 SV=3 - [SPB6\_HUMAN]  
 Alpha-soluble NSF attachment protein OS=Homo sapiens GN=NAPA PE=1 SV=3 - [SNAA\_HUMAN]  
 Ras-related protein Rab-5B OS=Homo sapiens GN=RAB5B PE=1 SV=1 - [RAB5B\_HUMAN]  
 Ras-related protein Rap-1A OS=Homo sapiens GN=RAP1A PE=1 SV=1 - [RAP1A\_HUMAN]  
 ADP-ribosylation factor 5 OS=Homo sapiens GN=ARF5 PE=1 SV=2 - [ARF5\_HUMAN]  
 Signal-regulatory protein beta-1 isoform 3 OS=Homo sapiens GN=SIRPB1 PE=1 SV=1 - [SIRBL\_HUM/  
 Zymogen granule protein 16 homolog B OS=Homo sapiens GN=ZG16B PE=1 SV=3 - [ZG16B\_HUMAN  
 Cytosol aminopeptidase OS=Homo sapiens GN=LAP3 PE=1 SV=3 - [AMPL\_HUMAN]  
 ATP-dependent RNA helicase DDX39A OS=Homo sapiens GN=DDX39A PE=1 SV=2 - [DX39A\_HUM  
 Syntenin-1 OS=Homo sapiens GN=SDCBP PE=1 SV=1 - [SDCB1\_HUMAN]  
 Flotillin-1 OS=Homo sapiens GN=FLOT1 PE=1 SV=3 - [FLOT1\_HUMAN]  
 Calpain small subunit 1 OS=Homo sapiens GN=CAPNS1 PE=1 SV=1 - [CPNS1\_HUMAN]  
 Cathepsin B OS=Homo sapiens GN=CTSB PE=1 SV=3 - [CATB\_HUMAN]  
 Lactoperoxidase OS=Homo sapiens GN=LPO PE=1 SV=2 - [PERL\_HUMAN]  
 ATP synthase subunit b, mitochondrial OS=Homo sapiens GN=ATP5F1 PE=1 SV=2 - [AT5F1\_HUMAN  
 Proteasome subunit alpha type-2 OS=Homo sapiens GN=PSMA2 PE=1 SV=2 - [PSA2\_HUMAN]  
 Prohibitin OS=Homo sapiens GN=PHB PE=1 SV=1 - [PHB\_HUMAN]  
 Phosphoglucomutase-1 OS=Homo sapiens GN=PGM1 PE=1 SV=3 - [PGM1\_HUMAN]  
 Ubiquitin-conjugating enzyme E2 N OS=Homo sapiens GN=UBE2N PE=1 SV=1 - [UBE2N\_HUMAN]  
 Ras-related protein Rap-2b OS=Homo sapiens GN=RAP2B PE=1 SV=1 - [RAP2B\_HUMAN]  
 Flotillin-2 OS=Homo sapiens GN=FLOT2 PE=1 SV=2 - [FLOT2\_HUMAN]  
 DNA damage-binding protein 1 OS=Homo sapiens GN=DDB1 PE=1 SV=1 - [DDB1\_HUMAN]  
 Torsin-1A-interacting protein 1 OS=Homo sapiens GN=TOR1AIP1 PE=1 SV=2 - [TOIP1\_HUMAN]  
 Putative Ras-related protein Rab-1C OS=Homo sapiens GN=RAB1C PE=5 SV=2 - [RAB1C\_HUMAN]  
 6-phosphogluconolactonase OS=Homo sapiens GN=PGLS PE=1 SV=2 - [6PGL\_HUMAN]  
 Hypoxanthine-guanine phosphoribosyltransferase OS=Homo sapiens GN=HPRT1 PE=1 SV=2 - [HPRT\_I  
 Protein S100-P OS=Homo sapiens GN=S100P PE=1 SV=2 - [S100P\_HUMAN]  
 Serine/threonine-protein phosphatase PP1-alpha catalytic subunit OS=Homo sapiens GN=PPP1CA PE=1 ;  
 Guanine nucleotide-binding protein G(I)/G(S)/G(T) subunit beta-1 OS=Homo sapiens GN=GNB1 PE=1 S  
 Complement C1r subcomponent OS=Homo sapiens GN=C1R PE=1 SV=2 - [C1R\_HUMAN]  
 Perilipin-3 OS=Homo sapiens GN=PLIN3 PE=1 SV=3 - [PLIN3\_HUMAN]  
 Glutathione peroxidase 1 OS=Homo sapiens GN=GPX1 PE=1 SV=4 - [GPX1\_HUMAN]  
 HLA class II histocompatibility antigen, DRB1-4 beta chain OS=Homo sapiens GN=HLA-DRB1 PE=1 S'  
 Carbonyl reductase [NADPH] 1 OS=Homo sapiens GN=CBR1 PE=1 SV=3 - [CBR1\_HUMAN]  
 Fumarylacetoacetase OS=Homo sapiens GN=FAH PE=1 SV=2 - [FAAA\_HUMAN]  
 6-phosphofructokinase, liver type OS=Homo sapiens GN=PFKL PE=1 SV=6 - [K6PL\_HUMAN]

Proteasome subunit alpha type-3 OS=Homo sapiens GN=PSMA3 PE=1 SV=2 - [PSA3\_HUMAN]  
 Proteasome subunit beta type-6 OS=Homo sapiens GN=PSMB6 PE=1 SV=4 - [PSB6\_HUMAN]  
 Acidic leucine-rich nuclear phosphoprotein 32 family member A OS=Homo sapiens GN=ANP32A PE=1 SV=2 - [ANP32A\_HUMAN]  
 Voltage-dependent anion-selective channel protein 2 OS=Homo sapiens GN=VDAC2 PE=1 SV=2 - [VDAC2\_HUMAN]  
 Proteasome subunit beta type-2 OS=Homo sapiens GN=PSMB2 PE=1 SV=1 - [PSB2\_HUMAN]  
 B-cell receptor-associated protein 31 OS=Homo sapiens GN=BCAP31 PE=1 SV=3 - [BAP31\_HUMAN]  
 Dipeptidyl peptidase 1 OS=Homo sapiens GN=CTSC PE=1 SV=2 - [CATC\_HUMAN]  
 Eukaryotic initiation factor 4A-I OS=Homo sapiens GN=EIF4A1 PE=1 SV=1 - [IF4A1\_HUMAN]  
 Alpha-centractin OS=Homo sapiens GN=ACTR1A PE=1 SV=1 - [ACTZ\_HUMAN]  
 Peptidyl-prolyl cis-trans isomerase FKBP1A OS=Homo sapiens GN=FKBP1A PE=1 SV=2 - [FKB1A\_HUMAN]  
 Complement factor H-related protein 1 OS=Homo sapiens GN=CFHR1 PE=1 SV=2 - [FHR1\_HUMAN]  
 Microtubule-associated protein RP/EB family member 1 OS=Homo sapiens GN=MAPRE1 PE=1 SV=3 - [MAPRE1\_HUMAN]  
 Mitogen-activated protein kinase 14 OS=Homo sapiens GN=MAPK14 PE=1 SV=3 - [MK14\_HUMAN]  
 HLA class I histocompatibility antigen, Cw-18 alpha chain OS=Homo sapiens GN=HLA-C PE=2 SV=1 - [HLA\_C\_HUMAN]  
 Histone H2A type 2-B OS=Homo sapiens GN=HIST2H2AB PE=1 SV=3 - [H2A2B\_HUMAN]  
 Acidic leucine-rich nuclear phosphoprotein 32 family member B OS=Homo sapiens GN=ANP32B PE=1 SV=2 - [ANP32B\_HUMAN]  
 Cytosolic non-specific dipeptidase OS=Homo sapiens GN=CNDP2 PE=1 SV=2 - [CNDP2\_HUMAN]  
 Prohibitin-2 OS=Homo sapiens GN=PHB2 PE=1 SV=2 - [PHB2\_HUMAN]  
 Calcium and integrin-binding protein 1 OS=Homo sapiens GN=CIB1 PE=1 SV=4 - [CIB1\_HUMAN]  
 GTPase IMAP family member 4 OS=Homo sapiens GN=GIMAP4 PE=1 SV=1 - [GIMA4\_HUMAN]  
 Voltage-dependent anion-selective channel protein 3 OS=Homo sapiens GN=VDAC3 PE=1 SV=1 - [VDAC3\_HUMAN]  
 40S ribosomal protein SA OS=Homo sapiens GN=RPSA PE=1 SV=4 - [RSSA\_HUMAN]  
 Proteasome subunit beta type-4 OS=Homo sapiens GN=PSMB4 PE=1 SV=4 - [PSB4\_HUMAN]  
 Neutrophil defensin 1 OS=Homo sapiens GN=DEFA1 PE=1 SV=1 - [DEF1\_HUMAN]  
 Importin subunit beta-1 OS=Homo sapiens GN=KPNB1 PE=1 SV=2 - [IMB1\_HUMAN]  
 Cystatin-A OS=Homo sapiens GN=CSTA PE=1 SV=1 - [CYTA\_HUMAN]  
 Alcohol dehydrogenase [NADP(+)] OS=Homo sapiens GN=AKR1A1 PE=1 SV=3 - [AK1A1\_HUMAN]  
 Sodium-dependent phosphate transport protein 2B OS=Homo sapiens GN=SLC34A2 PE=1 SV=3 - [NPT2B\_HUMAN]  
 HLA class II histocompatibility antigen, DRB1-1 beta chain OS=Homo sapiens GN=HLA-DRB1 PE=1 SV=1 - [HLA\_DRB1\_HUMAN]  
 Heat shock protein beta-1 OS=Homo sapiens GN=HSPB1 PE=1 SV=2 - [HSPB1\_HUMAN]  
 Aldehyde dehydrogenase, mitochondrial OS=Homo sapiens GN=ALDH2 PE=1 SV=2 - [ALDH2\_HUMAN]  
 Alkaline phosphatase, tissue-nonspecific isozyme OS=Homo sapiens GN=ALPL PE=1 SV=4 - [PPBT\_HUMAN]  
 Acyl-CoA-binding protein OS=Homo sapiens GN=DBI PE=1 SV=2 - [ACBP\_HUMAN]  
 Complement component C8 beta chain OS=Homo sapiens GN=C8B PE=1 SV=3 - [CO8B\_HUMAN]  
 HLA class I histocompatibility antigen, A-69 alpha chain OS=Homo sapiens GN=HLA-A PE=2 SV=2 - [HLA\_A\_HUMAN]  
 HLA class II histocompatibility antigen, DRB1-7 beta chain OS=Homo sapiens GN=HLA-DRB1 PE=1 SV=1 - [HLA\_DRB1\_HUMAN]  
 Glucosidase 2 subunit beta OS=Homo sapiens GN=PRKCSH PE=1 SV=2 - [GLU2B\_HUMAN]  
 Ribosylidihydronicotinamide dehydrogenase [quinone] OS=Homo sapiens GN=NQO2 PE=1 SV=5 - [NQO2\_HUMAN]  
 Cytochrome b-c1 complex subunit 2, mitochondrial OS=Homo sapiens GN=UQCRC2 PE=1 SV=3 - [UQCRC2\_HUMAN]  
 Cathepsin S OS=Homo sapiens GN=CTSS PE=1 SV=3 - [CATS\_HUMAN]  
 Mitogen-activated protein kinase 1 OS=Homo sapiens GN=MAPK1 PE=1 SV=3 - [MK01\_HUMAN]  
 60S ribosomal protein L12 OS=Homo sapiens GN=RPL12 PE=1 SV=1 - [RL12\_HUMAN]  
 Enoyl-CoA hydratase, mitochondrial OS=Homo sapiens GN=ECHS1 PE=1 SV=4 - [ECHM\_HUMAN]  
 10 kDa heat shock protein, mitochondrial OS=Homo sapiens GN=HSPE1 PE=1 SV=2 - [CH10\_HUMAN]



60S ribosomal protein L18 OS=Homo sapiens GN=RPL18 PE=1 SV=2 - [RL18\_HUMAN]  
 Interleukin enhancer-binding factor 2 OS=Homo sapiens GN=ILF2 PE=1 SV=2 - [ILF2\_HUMAN]  
 Nuclear mitotic apparatus protein 1 OS=Homo sapiens GN=NUMA1 PE=1 SV=2 - [NUMA1\_HUMAN]  
 Heterogeneous nuclear ribonucleoprotein A1-like 2 OS=Homo sapiens GN=HNRNPA1L2 PE=2 SV=2 - [  
 Mast cell-expressed membrane protein 1 OS=Homo sapiens GN=MCEMP1 PE=1 SV=1 - [MCEM1\_HUM  
 Ubiquitin thioesterase OTUB1 OS=Homo sapiens GN=OTUB1 PE=1 SV=2 - [OTUB1\_HUMAN]  
 Coronin-7 OS=Homo sapiens GN=CORO7 PE=1 SV=2 - [CORO7\_HUMAN]  
 Prostaglandin-H2 D-isomerase OS=Homo sapiens GN=PTGDS PE=1 SV=1 - [PTGDS\_HUMAN]  
 Inter-alpha-trypsin inhibitor heavy chain H3 OS=Homo sapiens GN=ITIH3 PE=1 SV=2 - [ITIH3\_HUMA  
 Tripeptidyl-peptidase 1 OS=Homo sapiens GN=TPP1 PE=1 SV=2 - [TPP1\_HUMAN]  
 Keratin, type I cuticular Ha8 OS=Homo sapiens GN=KRT38 PE=2 SV=3 - [KRT38\_HUMAN]  
 Ras-related protein Rab-3D OS=Homo sapiens GN=RAB3D PE=1 SV=1 - [RAB3D\_HUMAN]  
 HLA class II histocompatibility antigen, DRB1-3 chain OS=Homo sapiens GN=HLA-DRB1 PE=1 SV=2  
 Sodium/potassium-transporting ATPase subunit alpha-1 OS=Homo sapiens GN=ATP1A1 PE=1 SV=1 - [  
 Histone H1.0 OS=Homo sapiens GN=H1F0 PE=1 SV=3 - [H10\_HUMAN]  
 Ras-related protein Ral-A OS=Homo sapiens GN=RALA PE=1 SV=1 - [RALA\_HUMAN]  
 Keratin, type II cytoskeletal 3 OS=Homo sapiens GN=KRT3 PE=1 SV=3 - [K2C3\_HUMAN]  
 Translationally-controlled tumor protein OS=Homo sapiens GN=TPT1 PE=1 SV=1 - [TCTP\_HUMAN]  
 Annexin A7 OS=Homo sapiens GN=ANXA7 PE=1 SV=3 - [ANXA7\_HUMAN]  
 Proteasome subunit beta type-9 OS=Homo sapiens GN=PSMB9 PE=1 SV=2 - [PSB9\_HUMAN]  
 Proteasome subunit alpha type-5 OS=Homo sapiens GN=PSMA5 PE=1 SV=3 - [PSA5\_HUMAN]  
 ATP synthase subunit gamma, mitochondrial OS=Homo sapiens GN=ATP5C1 PE=1 SV=1 - [ATPG\_HU  
 ATP synthase subunit O, mitochondrial OS=Homo sapiens GN=ATP5O PE=1 SV=1 - [ATPO\_HUMAN]  
 Isocitrate dehydrogenase [NADP], mitochondrial OS=Homo sapiens GN=IDH2 PE=1 SV=2 - [IDHP\_HU  
 Proteasome subunit beta type-3 OS=Homo sapiens GN=PSMB3 PE=1 SV=2 - [PSB3\_HUMAN]  
 Heterogeneous nuclear ribonucleoprotein A3 OS=Homo sapiens GN=HNRNPA3 PE=1 SV=2 - [ROA3\_H  
 Vesicular integral-membrane protein VIP36 OS=Homo sapiens GN=LMAN2 PE=1 SV=1 - [LMAN2\_HU  
 Ras-related protein Rab-31 OS=Homo sapiens GN=RAB31 PE=1 SV=1 - [RAB31\_HUMAN]  
 Gamma-interferon-inducible protein 16 OS=Homo sapiens GN=IFI16 PE=1 SV=3 - [IF16\_HUMAN]  
 Thioredoxin reductase 1, cytoplasmic OS=Homo sapiens GN=TXNRD1 PE=1 SV=3 - [TRXR1\_HUMAN  
 Staphylococcal nuclease domain-containing protein 1 OS=Homo sapiens GN=SND1 PE=1 SV=1 - [SND1  
 Histone H1x OS=Homo sapiens GN=H1FX PE=1 SV=1 - [H1X\_HUMAN]  
 Interferon-stimulated gene 20 kDa protein OS=Homo sapiens GN=ISG20 PE=1 SV=2 - [ISG20\_HUMAN  
 ERO1-like protein alpha OS=Homo sapiens GN=ERO1L PE=1 SV=2 - [ERO1A\_HUMAN]  
 Keratin, type II cuticular Hb2 OS=Homo sapiens GN=KRT82 PE=1 SV=3 - [KRT82\_HUMAN]  
 Glutathione S-transferase kappa 1 OS=Homo sapiens GN=GSTK1 PE=1 SV=3 - [GSTK1\_HUMAN]  
 Sulfide:quinone oxidoreductase, mitochondrial OS=Homo sapiens GN=SQRDL PE=1 SV=1 - [SQRD\_HU  
 Citrate synthase, mitochondrial OS=Homo sapiens GN=CS PE=1 SV=2 - [CISY\_HUMAN]  
 Salivary acidic proline-rich phosphoprotein 1/2 OS=Homo sapiens GN=PRH1 PE=1 SV=2 - [PRPC\_HUM  
 Thyroxine-binding globulin OS=Homo sapiens GN=SERPINA7 PE=1 SV=2 - [THBG\_HUMAN]  
 Ig kappa chain V-III region IARC/BL41 OS=Homo sapiens PE=1 SV=1 - [KV311\_HUMAN]  
 Phosphatidylinositol-glycan-specific phospholipase D OS=Homo sapiens GN=GPLD1 PE=1 SV=3 - [PHI  
 Low affinity immunoglobulin gamma Fc region receptor III-A OS=Homo sapiens GN=FCGR3A PE=1 SV  
 Puromycin-sensitive aminopeptidase OS=Homo sapiens GN=NPEPPS PE=1 SV=2 - [PSA\_HUMAN]

Osteoclast-stimulating factor 1 OS=Homo sapiens GN=OSTF1 PE=1 SV=2 - [OSTF1\_HUMAN]  
 Glyoxalase domain-containing protein 4 OS=Homo sapiens GN=GLOD4 PE=1 SV=1 - [GLOD4\_HUMA  
 Cathepsin Z OS=Homo sapiens GN=CTSZ PE=1 SV=1 - [CATZ\_HUMAN]  
 Apolipoprotein C-I OS=Homo sapiens GN=APOC1 PE=1 SV=1 - [APOC1\_HUMAN]  
 Complement factor D OS=Homo sapiens GN=CFD PE=1 SV=5 - [CFAD\_HUMAN]  
 Apolipoprotein C-III OS=Homo sapiens GN=APOC3 PE=1 SV=1 - [APOC3\_HUMAN]  
 Prothrombin OS=Homo sapiens GN=F2 PE=1 SV=2 - [THRB\_HUMAN]  
 Insulin-like growth factor-binding protein complex acid labile subunit OS=Homo sapiens GN=IGFALS PI  
 Ig kappa chain V-II region TEW OS=Homo sapiens PE=1 SV=1 - [KV204\_HUMAN]  
 Ig lambda chain V-I region BL2 OS=Homo sapiens PE=2 SV=1 - [LV107\_HUMAN]  
 Complement C1s subcomponent OS=Homo sapiens GN=C1S PE=1 SV=1 - [C1S\_HUMAN]  
 Plasma kallikrein OS=Homo sapiens GN=KLKB1 PE=1 SV=1 - [KLKB1\_HUMAN]  
 Coagulation factor XIII A chain OS=Homo sapiens GN=F13A1 PE=1 SV=4 - [F13A\_HUMAN]  
 Histone H1t OS=Homo sapiens GN=HIST1H1T PE=2 SV=4 - [H1T\_HUMAN]  
 Ig lambda chain V-V region DEL OS=Homo sapiens PE=1 SV=1 - [LV501\_HUMAN]  
 Cholinesterase OS=Homo sapiens GN=BCHE PE=1 SV=1 - [CHLE\_HUMAN]  
 Macrophage colony-stimulating factor 1 receptor OS=Homo sapiens GN=CSF1R PE=1 SV=2 - [CSF1R\_I  
 Complement C1q subcomponent subunit B OS=Homo sapiens GN=C1QB PE=1 SV=3 - [C1QB\_HUMAN]  
 Sulfhydryl oxidase 1 OS=Homo sapiens GN=QSOX1 PE=1 SV=3 - [QSOX1\_HUMAN]  
 Spectrin alpha chain, erythrocytic 1 OS=Homo sapiens GN=SPTA1 PE=1 SV=5 - [SPTA1\_HUMAN]  
 Carboxypeptidase N subunit 2 OS=Homo sapiens GN=CPN2 PE=1 SV=3 - [CPN2\_HUMAN]  
 N-acetylmuramoyl-L-alanine amidase OS=Homo sapiens GN=PGLYRP2 PE=1 SV=1 - [PGRP2\_HUMA  
 Pregnancy zone protein OS=Homo sapiens GN=PZP PE=1 SV=4 - [PZP\_HUMAN]  
 Fibulin-1 OS=Homo sapiens GN=FBLN1 PE=1 SV=4 - [FBLN1\_HUMAN]  
 Apolipoprotein L1 OS=Homo sapiens GN=APOL1 PE=1 SV=5 - [APOL1\_HUMAN]  
 Keratin, type II cytoskeletal 6B OS=Homo sapiens GN=KRT6B PE=1 SV=5 - [K2C6B\_HUMAN]  
 Ig kappa chain V-I region AG OS=Homo sapiens PE=1 SV=1 - [KV101\_HUMAN]  
 Ig kappa chain V-IV region B17 OS=Homo sapiens PE=2 SV=1 - [KV404\_HUMAN]  
 Spectrin beta chain, erythrocytic OS=Homo sapiens GN=SPTB PE=1 SV=5 - [SPTB1\_HUMAN]  
 Coagulation factor XII OS=Homo sapiens GN=F12 PE=1 SV=3 - [FA12\_HUMAN]  
 Vitamin K-dependent protein S OS=Homo sapiens GN=PROS1 PE=1 SV=1 - [PROS\_HUMAN]  
 Carboxypeptidase N catalytic chain OS=Homo sapiens GN=CPN1 PE=1 SV=1 - [CBPN\_HUMAN]  
 Hemoglobin subunit gamma-2 OS=Homo sapiens GN=HBG2 PE=1 SV=2 - [HBG2\_HUMAN]  
 Ig kappa chain V-IV region JI OS=Homo sapiens PE=4 SV=1 - [KV403\_HUMAN]  
 Ig kappa chain V-III region B6 OS=Homo sapiens PE=1 SV=1 - [KV301\_HUMAN]  
 Vascular cell adhesion protein 1 OS=Homo sapiens GN=VCAM1 PE=1 SV=1 - [VCAM1\_HUMAN]  
 Cadherin-5 OS=Homo sapiens GN=CDH5 PE=1 SV=5 - [CADH5\_HUMAN]  
 Hepatocyte growth factor activator OS=Homo sapiens GN=HGFA PE=1 SV=1 - [HGFA\_HUMAN]  
 Vasorin OS=Homo sapiens GN=VASN PE=1 SV=1 - [VASN\_HUMAN]  
 Tetranectin OS=Homo sapiens GN=CLEC3B PE=1 SV=3 - [TETN\_HUMAN]  
 Ig kappa chain V-I region Mev OS=Homo sapiens PE=1 SV=1 - [KV120\_HUMAN]  
 Ankyrin-1 OS=Homo sapiens GN=ANK1 PE=1 SV=3 - [ANK1\_HUMAN]  
 Histone H1.2 OS=Homo sapiens GN=HIST1H1C PE=1 SV=2 - [H12\_HUMAN]  
 Biotinidase OS=Homo sapiens GN=BTD PE=1 SV=2 - [BTD\_HUMAN]

Extracellular matrix protein 1 OS=Homo sapiens GN=ECM1 PE=1 SV=2 - [ECM1\_HUMAN]

Cystatin-C OS=Homo sapiens GN=CST3 PE=1 SV=1 - [CYTC\_HUMAN]

Ig kappa chain V-II region RPMI 6410 OS=Homo sapiens PE=4 SV=1 - [KV206\_HUMAN]

Periostin OS=Homo sapiens GN=POSTN PE=1 SV=2 - [POSTN\_HUMAN]

Ig lambda chain V-VI region SUT OS=Homo sapiens PE=1 SV=1 - [LV603\_HUMAN]

as the sum for each group (Sum M and Sum S) and the total peptide count for all the samples to s

| <b>M1</b> | <b>M2</b> | <b>M3</b> | <b>S1</b> | <b>S2</b> | <b>S3</b> | <b>Sum M</b> | <b>Sum S</b> | <b>Total</b> |
|-----------|-----------|-----------|-----------|-----------|-----------|--------------|--------------|--------------|
| 381       | 921       | 559       | 43        | 82        | 198       | 1861         | 323          | 2184         |
| 408       | 849       | 338       | 28        | 47        | 67        | 1595         | 142          | 1737         |
| 672       | 472       | 303       | 21        | 44        | 30        | 1447         | 95           | 1542         |
| 153       | 784       | 425       | 6         | 3         | 19        | 1362         | 28           | 1390         |
| 134       | 714       | 174       | 7         | 6         | 14        | 1022         | 27           | 1049         |
| 33        | 447       | 182       | 82        | 88        | 161       | 662          | 331          | 993          |
| 134       | 317       | 201       | 2         |           | 17        | 652          | 19           | 671          |
| 271       | 222       | 141       | 8         | 8         | 19        | 634          | 35           | 669          |
| 91        | 354       | 128       | 16        | 20        | 58        | 573          | 94           | 667          |
| 200       | 196       | 136       | 61        | 58        | 67        | 532          | 186          | 718          |
| 125       | 234       | 166       | 37        | 110       | 74        | 525          | 221          | 746          |
| 88        | 228       | 150       | 14        | 9         | 42        | 466          | 65           | 531          |
| 21        | 204       | 236       | 6         |           | 18        | 461          | 24           | 485          |
| 73        | 308       | 78        | 11        | 10        | 33        | 459          | 54           | 513          |
| 83        | 166       | 206       |           |           | 14        | 455          | 14           | 469          |
| 125       | 234       | 95        |           | 134       | 74        | 454          | 208          | 662          |
| 76        | 187       | 180       | 5         | 3         | 36        | 443          | 44           | 487          |
| 94        | 147       | 200       | 9         | 12        | 43        | 441          | 64           | 505          |
| 55        | 296       | 74        | 40        | 30        | 92        | 425          | 162          | 587          |
| 96        | 196       | 132       | 11        | 11        | 41        | 424          | 63           | 487          |
|           | 415       |           |           |           |           | 415          | 0            | 415          |
| 57        | 284       | 74        | 12        | 10        | 35        | 415          | 57           | 472          |
| 73        | 230       | 109       | 9         | 22        | 32        | 412          | 63           | 475          |
| 114       | 210       | 86        | 56        | 73        | 72        | 410          | 201          | 611          |
| 13        | 251       | 145       | 26        | 24        | 60        | 409          | 110          | 519          |
| 68        | 231       | 86        |           |           | 12        | 385          | 12           | 397          |
| 79        | 164       | 139       | 6         | 2         | 29        | 382          | 37           | 419          |
| 48        | 184       | 131       | 2         |           |           | 363          | 2            | 365          |
| 155       | 114       | 71        | 12        | 30        | 15        | 340          | 57           | 397          |
| 60        | 178       | 100       |           |           | 8         | 338          | 8            | 346          |
| 47        | 192       | 85        | 3         | 2         | 22        | 324          | 27           | 351          |
| 170       | 85        | 57        | 13        | 23        | 24        | 312          | 60           | 372          |
| 45        | 108       | 140       | 3         |           | 29        | 293          | 32           | 325          |
| 50        | 191       | 49        | 7         | 8         | 27        | 290          | 42           | 332          |
| 38        | 140       | 110       | 6         | 3         | 15        | 288          | 24           | 312          |
| 41        | 149       | 85        | 18        | 42        | 57        | 275          | 117          | 392          |
| 47        | 113       | 109       |           |           | 11        | 269          | 11           | 280          |
|           | 175       | 90        |           |           | 33        | 265          | 33           | 298          |
| 20        | 183       | 44        |           | 5         | 4         | 247          | 9            | 256          |
| 50        | 122       | 74        | 3         |           | 6         | 246          | 9            | 255          |

|    |     |     |    |    |    |     |    |     |
|----|-----|-----|----|----|----|-----|----|-----|
| 36 | 147 | 50  | 5  | 11 | 16 | 233 | 32 | 265 |
| 41 | 127 | 60  | 4  |    | 9  | 228 | 13 | 241 |
| 48 | 96  | 81  | 11 | 10 | 14 | 225 | 35 | 260 |
| 27 | 97  | 91  |    |    | 9  | 215 | 9  | 224 |
|    |     | 214 |    |    |    | 214 | 0  | 214 |
| 20 | 102 | 78  | 8  | 4  | 15 | 200 | 27 | 227 |
| 17 | 103 | 75  | 6  |    | 15 | 195 | 21 | 216 |
| 33 | 84  | 77  |    |    |    | 194 | 0  | 194 |
| 4  | 148 | 35  |    |    |    | 187 | 0  | 187 |
| 41 | 120 | 25  |    | 27 | 25 | 186 | 52 | 238 |
| 34 | 98  | 50  | 6  | 7  | 15 | 182 | 28 | 210 |
|    | 177 |     |    |    |    | 177 | 0  | 177 |
| 36 | 66  | 73  | 3  |    | 6  | 175 | 9  | 184 |
| 29 | 62  | 78  | 4  |    | 7  | 169 | 11 | 180 |
|    | 168 |     |    |    |    | 168 | 0  | 168 |
| 25 | 100 | 39  | 5  | 5  | 5  | 164 | 15 | 179 |
| 24 | 107 | 32  | 4  | 7  | 9  | 163 | 20 | 183 |
| 33 | 39  | 86  | 8  | 3  | 6  | 158 | 17 | 175 |
| 38 | 62  | 55  | 6  | 3  | 20 | 155 | 29 | 184 |
| 32 | 67  | 55  | 5  | 6  | 9  | 154 | 20 | 174 |
| 4  | 146 | 3   | 25 | 38 | 10 | 153 | 73 | 226 |
| 30 | 53  | 69  | 2  | 4  | 8  | 152 | 14 | 166 |
| 48 | 101 |     |    | 57 |    | 149 | 57 | 206 |
| 31 | 101 | 17  | 12 | 25 | 23 | 149 | 60 | 209 |
| 33 | 72  | 43  | 7  | 7  | 15 | 148 | 29 | 177 |
| 15 | 52  | 73  |    |    | 2  | 140 | 2  | 142 |
| 9  | 58  | 73  | 6  |    | 10 | 140 | 16 | 156 |
| 26 | 77  | 37  | 8  | 11 | 17 | 140 | 36 | 176 |
| 31 | 60  | 46  | 7  |    | 22 | 137 | 29 | 166 |
| 23 | 74  | 33  | 2  |    | 6  | 130 | 8  | 138 |
| 23 | 49  | 56  |    |    |    | 128 | 0  | 128 |
| 16 | 73  | 38  |    | 2  | 8  | 127 | 10 | 137 |
| 19 | 66  | 36  |    |    |    | 121 | 0  | 121 |
| 28 | 37  | 55  | 5  | 5  | 11 | 120 | 21 | 141 |
| 15 | 64  | 39  | 3  | 5  | 12 | 118 | 20 | 138 |
| 12 | 35  | 68  |    |    | 25 | 115 | 25 | 140 |
| 25 | 39  | 50  | 7  | 5  | 11 | 114 | 23 | 137 |
| 22 | 47  | 44  | 5  |    | 5  | 113 | 10 | 123 |
| 7  | 74  | 31  |    |    | 11 | 112 | 11 | 123 |
| 30 | 59  | 22  |    | 3  | 5  | 111 | 8  | 119 |
| 27 | 52  | 29  | 3  | 3  | 8  | 108 | 14 | 122 |
| 17 | 43  | 45  | 3  | 7  | 15 | 105 | 25 | 130 |
| 24 | 34  | 44  |    | 4  | 6  | 102 | 10 | 112 |
| 16 | 58  | 26  |    |    |    | 100 | 0  | 100 |

|     |    |    |    |    |    |    |     |     |     |
|-----|----|----|----|----|----|----|-----|-----|-----|
|     |    | 52 | 48 |    |    |    | 100 | 0   | 100 |
|     |    | 97 |    |    |    | 26 | 97  | 26  | 123 |
|     | 9  | 35 | 51 | 5  | 3  | 9  | 95  | 17  | 112 |
|     | 25 | 45 | 24 | 4  | 2  | 10 | 94  | 16  | 110 |
|     | 17 | 53 | 22 |    |    |    | 92  | 0   | 92  |
|     | 6  | 56 | 29 |    |    |    | 91  | 0   | 91  |
|     | 9  | 43 | 39 |    |    | 8  | 91  | 8   | 99  |
|     |    | 72 | 19 | 27 | 14 |    | 91  | 41  | 132 |
|     | 19 | 46 | 25 |    |    | 7  | 90  | 7   | 97  |
|     | 22 | 35 | 33 | 2  | 2  | 6  | 90  | 10  | 100 |
|     | 13 | 36 | 38 |    |    | 3  | 87  | 3   | 90  |
|     | 2  | 83 | 2  | 2  | 6  | 4  | 87  | 12  | 99  |
|     | 12 | 46 | 29 | 4  | 2  | 11 | 87  | 17  | 104 |
|     | 17 | 39 | 30 |    | 2  | 7  | 86  | 9   | 95  |
| ∧N] |    | 43 | 42 | 6  |    | 14 | 85  | 20  | 105 |
|     | 19 | 8  | 58 | 3  |    | 18 | 85  | 21  | 106 |
|     | 11 | 39 | 34 |    |    |    | 84  | 0   | 84  |
|     | 14 | 39 | 31 |    |    | 14 | 84  | 14  | 98  |
|     |    | 15 | 68 |    |    |    | 83  | 0   | 83  |
|     | 12 | 71 |    |    |    |    | 83  | 0   | 83  |
|     | 12 | 34 | 37 |    |    | 2  | 83  | 2   | 85  |
|     | 8  | 45 | 30 |    |    | 2  | 83  | 2   | 85  |
|     | 8  | 51 | 23 |    |    | 12 | 82  | 12  | 94  |
|     |    | 71 | 9  | 3  |    | 11 | 80  | 14  | 94  |
|     | 5  | 49 | 25 |    |    | 6  | 79  | 6   | 85  |
|     | 16 | 45 | 18 | 5  | 5  | 6  | 79  | 16  | 95  |
|     | 23 | 44 | 10 | 10 | 10 | 6  | 77  | 26  | 103 |
|     | 4  | 34 | 37 |    |    |    | 75  | 0   | 75  |
|     | 29 |    | 46 | 4  | 6  | 11 | 75  | 21  | 96  |
|     | 32 | 14 | 27 |    |    | 4  | 73  | 4   | 77  |
|     | 32 | 29 | 10 | 11 | 15 | 9  | 71  | 35  | 106 |
|     | 27 |    | 43 |    |    |    | 70  | 0   | 70  |
|     | 21 | 20 | 29 |    |    | 7  | 70  | 7   | 77  |
|     | 13 | 52 | 5  | 4  | 3  | 5  | 70  | 12  | 82  |
|     | 10 | 30 | 30 | 3  | 2  | 8  | 70  | 13  | 83  |
| ∧]  |    | 23 | 42 |    |    | 3  | 65  | 3   | 68  |
|     | 12 | 27 | 26 | 4  | 8  | 9  | 65  | 21  | 86  |
|     | 17 | 34 | 14 | 62 | 88 | 55 | 65  | 205 | 270 |
|     | 7  | 33 | 22 | 2  | 3  | 9  | 62  | 14  | 76  |
|     | 15 | 18 | 28 |    |    | 2  | 61  | 2   | 63  |
|     | 19 | 27 | 14 | 2  | 7  | 7  | 60  | 16  | 76  |
|     |    | 59 |    |    |    |    | 59  | 0   | 59  |
|     | 45 | 14 |    |    |    |    | 59  | 0   | 59  |
|     | 5  | 34 | 19 |    |    |    | 58  | 0   | 58  |

|    |    |    |    |     |    |    |     |     |
|----|----|----|----|-----|----|----|-----|-----|
| 15 | 43 |    |    |     |    | 58 | 0   | 58  |
| 10 | 23 | 25 | 2  | 5   | 12 | 58 | 19  | 77  |
| 20 | 13 | 24 |    |     | 4  | 57 | 4   | 61  |
| 6  | 43 | 8  |    | 17  | 9  | 57 | 26  | 83  |
| 12 | 25 | 19 | 2  |     | 9  | 56 | 11  | 67  |
| 8  | 30 | 17 | 11 | 8   | 8  | 55 | 27  | 82  |
|    | 46 | 8  |    |     |    | 54 | 0   | 54  |
|    | 47 | 7  |    |     |    | 54 | 0   | 54  |
| 14 | 17 | 22 |    |     | 5  | 53 | 5   | 58  |
|    |    | 52 |    |     |    | 52 | 0   | 52  |
|    | 32 | 20 |    |     |    | 52 | 0   | 52  |
| 16 | 23 | 13 | 3  | 7   | 9  | 52 | 19  | 71  |
|    | 51 |    |    |     |    | 51 | 0   | 51  |
| 5  | 35 | 11 |    |     |    | 51 | 0   | 51  |
| 11 | 15 | 25 | 3  |     | 3  | 51 | 6   | 57  |
| 13 | 18 | 20 |    |     | 9  | 51 | 9   | 60  |
| 10 | 21 | 19 |    |     | 4  | 50 | 4   | 54  |
| 15 | 17 | 18 |    |     | 5  | 50 | 5   | 55  |
| 7  | 23 | 20 | 2  | 2   | 4  | 50 | 8   | 58  |
| 12 | 20 | 18 | 2  | 3   | 5  | 50 | 10  | 60  |
| 21 | 29 |    | 2  | 9   |    | 50 | 11  | 61  |
| 14 | 23 | 12 |    |     |    | 49 | 0   | 49  |
| 7  | 6  | 36 |    |     |    | 49 | 0   | 49  |
| 7  | 28 | 14 | 6  | 4   | 7  | 49 | 17  | 66  |
| 12 | 25 | 12 | 58 | 101 | 90 | 49 | 249 | 298 |
| 12 | 17 | 19 | 2  | 3   | 3  | 48 | 8   | 56  |
| 8  | 40 |    |    | 17  |    | 48 | 17  | 65  |
| 7  | 26 | 14 |    |     |    | 47 | 0   | 47  |
| 13 | 24 | 10 | 2  |     |    | 47 | 2   | 49  |
| 8  | 20 | 18 | 2  |     | 2  | 46 | 4   | 50  |
| 2  | 7  | 37 |    |     | 7  | 46 | 7   | 53  |
| 10 | 18 | 18 |    | 4   | 9  | 46 | 13  | 59  |
| 7  | 14 | 24 |    |     |    | 45 | 0   | 45  |
|    | 45 |    |    |     |    | 45 | 0   | 45  |
|    | 45 |    |    |     |    | 45 | 0   | 45  |
|    | 44 |    |    |     |    | 44 | 0   | 44  |
| 16 | 12 | 16 |    |     | 8  | 44 | 8   | 52  |
| 11 | 17 | 16 | 3  |     | 6  | 44 | 9   | 53  |
| 6  | 24 | 13 |    |     |    | 43 | 0   | 43  |
| 6  | 28 | 8  |    |     |    | 42 | 0   | 42  |
| 9  | 13 | 20 |    |     | 4  | 42 | 4   | 46  |
| 3  | 16 | 23 | 2  | 7   | 7  | 42 | 16  | 58  |
|    | 41 |    |    |     |    | 41 | 0   | 41  |
|    |    | 40 |    |     |    | 40 | 0   | 40  |

|         |    |    |   |    |    |    |    |    |
|---------|----|----|---|----|----|----|----|----|
| [MAN]   | 31 | 9  |   |    |    | 40 | 0  | 40 |
| 4       | 28 | 8  |   |    | 5  | 40 | 5  | 45 |
|         | 35 | 4  |   |    |    | 39 | 0  | 39 |
| 12      | 6  | 21 |   |    | 8  | 39 | 8  | 47 |
| 5       | 33 |    |   |    |    | 38 | 0  | 38 |
| 3       | 24 | 11 |   |    |    | 38 | 0  | 38 |
| 8       | 19 | 11 |   |    |    | 38 | 0  | 38 |
|         | 30 | 8  |   |    | 2  | 38 | 2  | 40 |
| 16      |    | 21 |   |    | 2  | 37 | 2  | 39 |
|         | 20 | 17 |   |    | 8  | 37 | 8  | 45 |
| 8       | 17 | 12 |   |    | 8  | 37 | 8  | 45 |
| 7       | 29 |    |   |    |    | 36 | 0  | 36 |
| 8       | 15 | 13 |   |    | 5  | 36 | 5  | 41 |
| 19      | 13 | 4  |   |    | 5  | 36 | 5  | 41 |
| 4       | 12 | 20 |   |    | 6  | 36 | 6  | 42 |
| 6       | 13 | 17 |   | 3  | 4  | 36 | 7  | 43 |
| 6       | 9  | 21 |   | 3  | 9  | 36 | 12 | 48 |
| 12      | 9  | 14 |   |    | 2  | 35 | 2  | 37 |
| 5       | 15 | 14 | 4 |    | 5  | 34 | 9  | 43 |
| 3       | 16 | 14 |   |    |    | 33 | 0  | 33 |
| 10      |    | 23 |   |    |    | 33 | 0  | 33 |
| 32      |    |    |   |    |    | 32 | 0  | 32 |
| 5       | 12 | 15 |   |    | 3  | 32 | 3  | 35 |
| 14      | 7  | 11 |   | 5  | 2  | 32 | 7  | 39 |
|         |    | 31 |   |    | 2  | 31 | 2  | 33 |
| 4       | 16 | 10 |   |    |    | 30 | 0  | 30 |
| 3       | 22 | 5  |   |    |    | 30 | 0  | 30 |
| 3       | 3  | 24 |   |    | 2  | 30 | 2  | 32 |
| 6       | 11 | 12 |   |    |    | 29 | 0  | 29 |
| OA2_HUM | 9  | 20 |   |    | 2  | 29 | 2  | 31 |
| 4       | 15 | 10 |   |    | 4  | 29 | 4  | 33 |
|         | 24 | 3  |   |    |    | 27 | 0  | 27 |
| 6       | 5  | 16 |   |    |    | 27 | 0  | 27 |
|         | 14 | 12 |   |    |    | 26 | 0  | 26 |
|         |    | 26 |   |    |    | 26 | 0  | 26 |
| 10      | 4  | 12 |   |    |    | 26 | 0  | 26 |
| 3       | 2  | 21 |   |    | 2  | 26 | 2  | 28 |
| 5       | 11 | 10 |   |    | 2  | 26 | 2  | 28 |
| 7       | 11 | 8  |   |    | 6  | 26 | 6  | 32 |
| 9       | 13 | 4  | 4 | 6  |    | 26 | 10 | 36 |
| 3       | 6  | 16 |   |    | 2  | 25 | 2  | 27 |
| 9       | 11 | 5  |   |    | 4  | 25 | 4  | 29 |
| 6       | 12 | 7  | 6 | 21 | 24 | 25 | 51 | 76 |
| 5       | 8  | 11 |   |    |    | 24 | 0  | 24 |



|          |    |    |    |    |    |    |    |    |     |
|----------|----|----|----|----|----|----|----|----|-----|
|          | 6  | 5  | 13 |    |    |    | 24 | 0  | 24  |
| UMAN]    |    | 11 | 12 |    |    |    | 23 | 0  | 23  |
|          | 6  | 10 | 7  |    |    | 3  | 23 | 3  | 26  |
|          | 5  | 8  | 10 | 14 | 26 | 15 | 23 | 55 | 78  |
|          | 4  |    | 19 | 8  | 25 | 35 | 23 | 68 | 91  |
|          | 6  | 16 |    |    |    |    | 22 | 0  | 22  |
| [SHPS1_H |    | 12 | 10 |    |    |    | 22 | 0  | 22  |
|          |    | 22 |    |    |    |    | 22 | 0  | 22  |
|          |    |    | 22 |    |    |    | 22 | 0  | 22  |
|          | 2  | 18 | 2  | 2  |    | 8  | 22 | 10 | 32  |
|          | 10 | 7  | 5  | 9  | 15 | 42 | 22 | 66 | 88  |
|          |    |    | 21 |    |    |    | 21 | 0  | 21  |
|          | 2  |    | 19 |    |    |    | 21 | 0  | 21  |
|          | 5  | 10 | 6  |    |    |    | 21 | 0  | 21  |
|          | 5  | 9  | 7  |    |    | 2  | 21 | 2  | 23  |
|          | 2  | 8  | 11 |    |    | 2  | 21 | 2  | 23  |
|          | 4  | 8  | 9  |    |    | 3  | 21 | 3  | 24  |
|          |    | 7  | 14 | 23 | 16 | 46 | 21 | 85 | 106 |
|          |    | 20 |    |    |    |    | 20 | 0  | 20  |
| HUMAN]   |    | 16 | 4  |    |    |    | 20 | 0  | 20  |
|          | 6  | 5  | 9  |    |    |    | 20 | 0  | 20  |
|          |    | 13 | 7  |    |    |    | 20 | 0  | 20  |
|          | 8  | 12 |    |    |    | 4  | 20 | 4  | 24  |
|          | 5  | 2  | 13 |    |    | 6  | 20 | 6  | 26  |
|          |    | 11 | 9  | 2  | 3  | 3  | 20 | 8  | 28  |
|          | 2  | 9  | 8  |    |    |    | 19 | 0  | 19  |
|          |    |    | 19 |    |    |    | 19 | 0  | 19  |
|          | 11 | 8  |    |    |    |    | 19 | 0  | 19  |
|          |    | 19 |    |    |    |    | 19 | 0  | 19  |
|          |    | 8  | 11 |    |    |    | 19 | 0  | 19  |
|          |    | 4  | 15 |    |    | 4  | 19 | 4  | 23  |
|          |    | 10 | 9  |    |    | 5  | 19 | 5  | 24  |
|          | 4  | 15 |    |    | 4  | 4  | 19 | 8  | 27  |
|          | 9  | 5  | 4  |    |    |    | 18 | 0  | 18  |
|          |    | 18 |    |    |    |    | 18 | 0  | 18  |
|          |    | 18 |    |    |    |    | 18 | 0  | 18  |
|          |    | 5  | 13 |    |    |    | 18 | 0  | 18  |
|          | 2  | 8  | 8  |    |    |    | 18 | 0  | 18  |
|          | 3  | 6  | 9  |    | 2  | 5  | 18 | 7  | 25  |
|          | 4  | 3  | 10 |    |    |    | 17 | 0  | 17  |
| N]       |    | 13 | 4  |    |    |    | 17 | 0  | 17  |
|          |    | 4  | 13 |    |    |    | 17 | 0  | 17  |
|          | 3  | 9  | 5  |    |    | 2  | 17 | 2  | 19  |
|          |    | 10 | 7  |    |    | 2  | 17 | 2  | 19  |

|             |    |    |    |   |    |    |    |    |
|-------------|----|----|----|---|----|----|----|----|
|             | 6  | 11 |    |   | 2  | 17 | 2  | 19 |
| MAN]        | 4  | 13 |    |   | 2  | 17 | 2  | 19 |
|             | 4  | 13 |    |   | 5  | 17 | 5  | 22 |
| 6           | 8  | 3  | 2  |   | 3  | 17 | 5  | 22 |
| 7           | 10 |    |    | 6 |    | 17 | 6  | 23 |
| 8           | 9  |    | 7  |   |    | 17 | 7  | 24 |
| 2           | 8  | 6  |    |   |    | 16 | 0  | 16 |
| 5           |    | 11 |    |   |    | 16 | 0  | 16 |
| 4           | 6  | 6  |    |   |    | 16 | 0  | 16 |
|             | 16 |    |    |   |    | 16 | 0  | 16 |
|             | 8  | 8  |    |   |    | 16 | 0  | 16 |
| 6           | 5  | 5  |    |   |    | 16 | 0  | 16 |
| 2           | 6  | 8  |    |   |    | 16 | 0  | 16 |
| 3           | 4  | 9  |    |   | 2  | 16 | 2  | 18 |
| 6           |    | 10 |    | 3 |    | 16 | 3  | 19 |
|             | 3  | 13 | 10 | 9 | 14 | 16 | 33 | 49 |
| 2           | 11 | 2  |    |   |    | 15 | 0  | 15 |
| 'IMT_HUN    | 3  | 12 |    |   |    | 15 | 0  | 15 |
| [UMAN]      | 5  | 10 |    |   |    | 15 | 0  | 15 |
| √]          |    | 15 |    |   |    | 15 | 0  | 15 |
| 2           | 7  | 6  |    |   |    | 15 | 0  | 15 |
|             | 15 |    |    |   |    | 15 | 0  | 15 |
|             |    | 15 |    |   |    | 15 | 0  | 15 |
|             | 9  | 6  |    |   |    | 15 | 0  | 15 |
| 2           | 8  | 5  |    | 2 |    | 15 | 2  | 17 |
| 2           | 3  | 10 |    |   | 2  | 15 | 2  | 17 |
| 2           |    | 13 |    |   | 2  | 15 | 2  | 17 |
| 5           | 5  | 5  |    | 7 |    | 15 | 7  | 22 |
| 9           | 5  |    |    |   |    | 14 | 0  | 14 |
| [UMAN]      |    | 14 |    |   |    | 14 | 0  | 14 |
|             | 8  | 6  |    |   |    | 14 | 0  | 14 |
| 4           | 3  | 7  |    |   |    | 14 | 0  | 14 |
| 2           |    | 12 |    |   |    | 14 | 0  | 14 |
| 3           | 2  | 9  |    |   |    | 14 | 0  | 14 |
|             | 7  | 7  |    |   |    | 14 | 0  | 14 |
|             | 4  | 10 |    |   |    | 14 | 0  | 14 |
| 8           |    | 6  |    |   | 3  | 14 | 3  | 17 |
| 3           | 5  | 6  |    |   | 3  | 14 | 3  | 17 |
| 7           | 6  |    |    |   |    | 13 | 0  | 13 |
| 2           |    | 11 |    |   |    | 13 | 0  | 13 |
|             | 8  | 5  |    |   |    | 13 | 0  | 13 |
| [A33_HUMAN] |    | 13 |    |   |    | 13 | 0  | 13 |
|             | 7  | 6  |    |   |    | 13 | 0  | 13 |
| 3           | 4  | 6  |    |   |    | 13 | 0  | 13 |

|             |    |    |   |   |    |    |    |    |
|-------------|----|----|---|---|----|----|----|----|
| .B15_HUMAN] |    | 13 |   |   |    | 13 | 0  | 13 |
| 5           | 4  | 4  |   |   |    | 13 | 0  | 13 |
|             | 11 | 2  |   |   |    | 13 | 0  | 13 |
| =2 - [ASC_  | 7  | 6  |   |   |    | 13 | 0  | 13 |
| 2           |    | 11 |   |   | 3  | 13 | 3  | 16 |
| [SH3L3_H    | 7  | 6  |   |   | 3  | 13 | 3  | 16 |
| 2           | 2  | 9  | 2 |   | 2  | 13 | 4  | 17 |
| 4           | 6  | 3  | 2 |   | 2  | 13 | 4  | 17 |
|             |    | 12 |   |   |    | 12 | 0  | 12 |
| 1A30_HUMAN] |    | 12 |   |   |    | 12 | 0  | 12 |
| 308_HUMAN]  |    | 12 |   |   |    | 12 | 0  | 12 |
| ↓]          |    | 12 |   |   |    | 12 | 0  | 12 |
|             | 2  | 10 |   |   |    | 12 | 0  | 12 |
| 4           | 3  | 5  |   |   | 2  | 12 | 2  | 14 |
|             | 5  | 7  |   |   | 2  | 12 | 2  | 14 |
|             | 6  | 6  |   |   | 3  | 12 | 3  | 15 |
|             |    | 12 |   |   | 4  | 12 | 4  | 16 |
|             | 4  | 8  | 2 | 8 | 16 | 12 | 26 | 38 |
|             |    | 11 |   |   |    | 11 | 0  | 11 |
|             |    | 11 |   |   |    | 11 | 0  | 11 |
|             |    | 11 |   |   |    | 11 | 0  | 11 |
|             | 2  | 9  |   |   |    | 11 | 0  | 11 |
| 3           |    | 8  |   |   |    | 11 | 0  | 11 |
|             | 2  | 9  |   |   |    | 11 | 0  | 11 |
| 2           |    | 9  |   |   |    | 11 | 0  | 11 |
| 11          |    |    |   |   | 2  | 11 | 2  | 13 |
| 4           |    | 7  |   |   | 4  | 11 | 4  | 15 |
| 2           |    | 8  |   |   |    | 10 | 0  | 10 |
| 4           | 6  |    |   |   |    | 10 | 0  | 10 |
| 3           | 2  | 5  |   |   |    | 10 | 0  | 10 |
|             | 2  | 8  |   |   |    | 10 | 0  | 10 |
| 10          |    |    |   |   |    | 10 | 0  | 10 |
|             | 10 |    |   |   |    | 10 | 0  | 10 |
|             | 10 |    |   |   |    | 10 | 0  | 10 |
| 3           |    | 7  |   |   |    | 10 | 0  | 10 |
| AN]         | 3  | 7  |   |   |    | 10 | 0  | 10 |
| N]          | 4  | 6  |   |   |    | 10 | 0  | 10 |
| 2           |    | 8  |   |   |    | 10 | 0  | 10 |
| 3           |    | 7  |   |   |    | 10 | 0  | 10 |
| MAN]        | 10 |    |   |   |    | 10 | 0  | 10 |
|             | 3  | 7  |   |   |    | 10 | 0  | 10 |
| MAN]        |    | 10 |   |   |    | 10 | 0  | 10 |
| 5           | 2  | 3  |   |   |    | 10 | 0  | 10 |
| 7           |    | 2  |   |   |    | 9  | 0  | 9  |

|                  |   |   |   |   |   |   |    |
|------------------|---|---|---|---|---|---|----|
|                  | 3 | 4 | 2 |   | 9 | 0 | 9  |
|                  | 2 | 4 | 3 |   | 9 | 0 | 9  |
|                  |   |   | 9 |   | 9 | 0 | 9  |
|                  | 9 |   |   |   | 9 | 0 | 9  |
|                  |   | 6 | 3 |   | 9 | 0 | 9  |
|                  |   | 3 | 6 |   | 9 | 0 | 9  |
| IAI3_HUMAN]      |   |   | 9 |   | 9 | 0 | 9  |
| HUMAN]           |   |   | 9 |   | 9 | 0 | 9  |
|                  |   | 2 | 7 |   | 9 | 0 | 9  |
|                  | 2 |   | 7 |   | 9 | 0 | 9  |
|                  |   |   | 9 |   | 9 | 0 | 9  |
|                  |   |   | 9 |   | 9 | 0 | 9  |
|                  |   |   | 9 |   | 9 | 0 | 9  |
|                  | 3 |   | 6 |   | 9 | 0 | 9  |
|                  | 9 |   |   |   | 9 | 0 | 9  |
|                  |   |   | 9 | 3 | 9 | 3 | 12 |
| AN]              |   | 2 | 6 |   | 8 | 0 | 8  |
|                  | 3 | 3 | 2 |   | 8 | 0 | 8  |
|                  | 2 | 2 | 4 |   | 8 | 0 | 8  |
|                  | 3 |   | 5 |   | 8 | 0 | 8  |
|                  | 3 |   | 5 |   | 8 | 0 | 8  |
|                  | 8 |   |   |   | 8 | 0 | 8  |
| ]                |   |   | 8 |   | 8 | 0 | 8  |
|                  |   |   | 8 |   | 8 | 0 | 8  |
|                  |   |   | 8 |   | 8 | 0 | 8  |
|                  |   | 4 | 4 |   | 8 | 0 | 8  |
|                  | 2 | 4 | 2 |   | 8 | 0 | 8  |
|                  | 2 |   | 6 |   | 8 | 0 | 8  |
|                  | 2 | 2 | 4 |   | 8 | 0 | 8  |
|                  |   |   | 8 |   | 8 | 0 | 8  |
|                  |   | 5 | 3 |   | 8 | 0 | 8  |
|                  |   | 8 |   |   | 8 | 0 | 8  |
|                  |   |   | 8 | 2 | 8 | 2 | 10 |
| HUMAN]           |   | 3 | 5 | 2 | 8 | 2 | 10 |
|                  |   | 8 |   | 2 | 8 | 2 | 10 |
| SV=1 - [PP1A_HUM |   |   | 8 | 2 | 8 | 2 | 10 |
|                  | 5 | 3 |   | 2 | 8 | 2 | 10 |
|                  |   |   | 8 | 4 | 8 | 4 | 12 |
|                  |   | 4 | 3 |   | 7 | 0 | 7  |
|                  | 4 |   | 3 |   | 7 | 0 | 7  |
| V=1 - [2B1       |   | 7 |   |   | 7 | 0 | 7  |
|                  |   |   | 7 |   | 7 | 0 | 7  |
|                  | 2 | 3 | 2 |   | 7 | 0 | 7  |
|                  |   | 5 | 2 |   | 7 | 0 | 7  |

|                  |   |   |   |   |   |    |
|------------------|---|---|---|---|---|----|
|                  |   | 7 |   | 7 | 0 | 7  |
| 2                | 2 | 3 |   | 7 | 0 | 7  |
| 3                |   | 4 |   | 7 | 0 | 7  |
| AC2_HUMAN]       |   | 7 |   | 7 | 0 | 7  |
| 3                |   | 4 |   | 7 | 0 | 7  |
|                  | 3 | 4 |   | 7 | 0 | 7  |
| 3                | 2 | 2 |   | 7 | 0 | 7  |
|                  | 2 | 5 |   | 7 | 0 | 7  |
|                  | 2 | 5 |   | 7 | 0 | 7  |
| 2                |   | 5 |   | 7 | 0 | 7  |
|                  |   | 7 |   | 7 | 0 | 7  |
| 3                |   | 4 |   | 7 | 0 | 7  |
|                  |   | 7 |   | 7 | 0 | 7  |
| [1C18_HU         | 7 |   |   | 7 | 0 | 7  |
|                  |   | 7 |   | 7 | 0 | 7  |
| SV=1 - [A]       | 2 | 5 |   | 7 | 0 | 7  |
| 3                |   | 4 |   | 7 | 0 | 7  |
|                  |   | 7 |   | 7 | 0 | 7  |
| 7                |   |   |   | 7 | 0 | 7  |
|                  | 2 | 5 |   | 7 | 0 | 7  |
| 3                |   | 4 |   | 7 | 0 | 7  |
|                  |   | 7 | 2 | 7 | 2 | 9  |
|                  |   | 7 | 2 | 7 | 2 | 9  |
|                  | 4 | 3 | 2 | 7 | 2 | 9  |
|                  | 2 | 5 | 2 | 7 | 2 | 9  |
| 3                | 2 | 2 | 3 | 7 | 3 | 10 |
|                  |   | 7 | 3 | 7 | 3 | 10 |
| 4                |   | 2 |   | 6 | 0 | 6  |
| 6                |   |   |   | 6 | 0 | 6  |
|                  | 2 | 4 |   | 6 | 0 | 6  |
| .N]              |   | 6 |   | 6 | 0 | 6  |
| JMAN]            | 6 |   |   | 6 | 0 | 6  |
|                  | 3 | 3 |   | 6 | 0 | 6  |
| 2                | 2 | 2 |   | 6 | 0 | 6  |
| 1A69_HU          | 6 |   |   | 6 | 0 | 6  |
| V=1 - [2B17_HUMA |   | 6 |   | 6 | 0 | 6  |
| 3                |   | 3 |   | 6 | 0 | 6  |
| D2_HUMAN]        |   | 6 |   | 6 | 0 | 6  |
| R2_HUMAN]        |   | 6 |   | 6 | 0 | 6  |
| 2                |   | 4 |   | 6 | 0 | 6  |
|                  |   | 6 |   | 6 | 0 | 6  |
|                  | 2 | 4 |   | 6 | 0 | 6  |
|                  |   | 6 |   | 6 | 0 | 6  |
| 3                |   | 3 |   | 6 | 0 | 6  |

|              |   |   |   |    |    |    |   |    |    |
|--------------|---|---|---|----|----|----|---|----|----|
|              |   | 2 | 4 |    |    |    | 6 | 0  | 6  |
|              | 3 |   | 3 |    |    |    | 6 | 0  | 6  |
|              |   |   | 6 |    |    |    | 6 | 0  | 6  |
| MAN]         | 2 | 4 |   |    |    |    | 6 | 0  | 6  |
|              |   | 4 | 2 |    |    |    | 6 | 0  | 6  |
|              |   |   | 6 |    |    |    | 6 | 0  | 6  |
|              |   |   | 6 |    |    | 2  | 6 | 2  | 8  |
|              | 4 |   | 2 | 8  | 12 | 2  | 6 | 22 | 28 |
| N]           |   | 2 | 4 | 11 |    | 25 | 6 | 36 | 42 |
|              |   | 2 | 3 |    |    |    | 5 | 0  | 5  |
|              |   | 5 |   |    |    |    | 5 | 0  | 5  |
|              |   |   | 5 |    |    |    | 5 | 0  | 5  |
| 5            |   |   |   |    |    |    | 5 | 0  | 5  |
| AT1A1_HUMAN] |   |   | 5 |    |    |    | 5 | 0  | 5  |
|              | 2 | 3 |   |    |    |    | 5 | 0  | 5  |
|              |   |   | 5 |    |    |    | 5 | 0  | 5  |
|              |   | 5 |   |    |    |    | 5 | 0  | 5  |
|              | 2 |   | 3 |    |    |    | 5 | 0  | 5  |
|              |   |   | 5 |    |    |    | 5 | 0  | 5  |
|              |   |   | 5 |    |    |    | 5 | 0  | 5  |
|              | 2 |   | 3 |    |    |    | 5 | 0  | 5  |
|              |   |   | 5 |    |    |    | 5 | 0  | 5  |
| MAN]         |   |   | 5 |    |    |    | 5 | 0  | 5  |
|              | 2 |   | 3 |    |    |    | 5 | 0  | 5  |
| IUMAN]       |   |   | 5 |    |    |    | 5 | 0  | 5  |
| JMAN]        |   |   | 5 |    |    |    | 5 | 0  | 5  |
|              |   | 2 | 3 |    |    |    | 5 | 0  | 5  |
|              |   |   | 5 |    |    |    | 5 | 0  | 5  |
| I]           |   | 3 | 2 |    |    |    | 5 | 0  | 5  |
| [_HUMAN]     |   |   | 5 |    |    |    | 5 | 0  | 5  |
|              | 3 | 2 |   |    |    |    | 5 | 0  | 5  |
| I]           |   |   | 5 |    |    |    | 5 | 0  | 5  |
|              |   |   | 5 |    |    |    | 5 | 0  | 5  |
|              |   | 5 |   |    |    |    | 5 | 0  | 5  |
|              |   |   | 5 |    |    |    | 5 | 0  | 5  |
| JMAN]        |   |   | 5 |    |    | 2  | 5 | 2  | 7  |
|              | 5 |   |   |    | 2  |    | 5 | 2  | 7  |
|              |   |   | 5 | 2  |    |    | 5 | 2  | 7  |
|              | 2 | 3 |   |    |    | 2  | 5 | 2  | 7  |
| LD_HUMAN]    |   |   | 5 | 5  | 2  | 11 | 5 | 18 | 23 |
|              | 2 | 2 |   |    |    | 2  | 4 | 2  | 6  |
|              |   |   | 4 |    |    | 2  | 4 | 2  | 6  |

|                    |   |    |    |    |    |   |    |    |
|--------------------|---|----|----|----|----|---|----|----|
|                    |   | 4  |    |    | 2  | 4 | 2  | 6  |
| 2                  |   | 2  |    |    | 2  | 4 | 2  | 6  |
|                    | 2 | 2  |    |    | 2  | 4 | 2  | 6  |
|                    |   | 4  | 2  |    | 6  | 4 | 8  | 12 |
|                    |   | 4  | 3  | 8  | 2  | 4 | 13 | 17 |
|                    | 2 | 2  | 5  | 6  | 11 | 4 | 22 | 26 |
|                    |   | 4  | 14 | 22 | 11 | 4 | 47 | 51 |
| E=1 SV=1 - [ALS_HI |   | 4  | 13 | 19 | 15 | 4 | 47 | 51 |
| 3                  |   |    |    |    | 7  | 3 | 7  | 10 |
| 3                  |   |    |    | 6  | 3  | 3 | 9  | 12 |
|                    |   | 3  |    | 5  | 6  | 3 | 11 | 14 |
|                    |   | 3  | 8  | 11 | 10 | 3 | 29 | 32 |
|                    |   | 2  |    | 2  | 2  | 2 | 4  | 6  |
|                    |   | 2  |    | 4  |    | 2 | 4  | 6  |
|                    |   | 2  | 3  | 3  |    | 2 | 6  | 8  |
|                    |   | 2  |    | 4  | 2  | 2 | 6  | 8  |
| HUMAN]             |   | 2  |    | 4  | 2  | 2 | 6  | 8  |
| √]                 |   | 2  | 2  | 5  | 8  | 2 | 15 | 17 |
|                    | 2 |    | 2  | 13 | 3  | 2 | 18 | 20 |
|                    |   | 2  | 10 | 9  |    | 2 | 19 | 21 |
|                    |   | 2  | 5  | 6  | 9  | 2 | 20 | 22 |
|                    | 2 |    | 5  | 14 | 5  | 2 | 24 | 26 |
|                    |   |    |    | 60 |    | 0 | 60 | 60 |
|                    |   |    | 22 | 12 | 11 | 0 | 45 | 45 |
|                    |   |    | 14 | 17 | 12 | 0 | 43 | 43 |
|                    |   |    |    | 27 |    | 0 | 27 | 27 |
|                    |   |    | 11 |    | 15 | 0 | 26 | 26 |
|                    |   |    |    | 25 |    | 0 | 25 | 25 |
|                    |   |    | 6  | 16 |    | 0 | 22 | 22 |
|                    |   |    | 8  | 8  | 5  | 0 | 21 | 21 |
|                    |   |    | 5  | 8  | 6  | 0 | 19 | 19 |
|                    |   |    | 4  | 8  | 4  | 0 | 16 | 16 |
|                    |   |    |    | 15 |    | 0 | 15 | 15 |
|                    |   | 13 |    |    |    | 0 | 13 | 13 |
|                    |   | 8  |    |    | 4  | 0 | 12 | 12 |
|                    |   |    | 8  |    | 3  | 0 | 11 | 11 |
|                    |   | 2  | 7  |    | 2  | 0 | 11 | 11 |
|                    |   | 2  | 7  |    | 2  | 0 | 11 | 11 |
|                    |   | 3  | 8  |    |    | 0 | 11 | 11 |
|                    |   | 2  | 4  | 4  |    | 0 | 10 | 10 |
|                    |   |    | 8  |    |    | 0 | 8  | 8  |
|                    |   |    | 8  |    |    | 0 | 8  | 8  |
|                    |   | 3  |    |    | 5  | 0 | 8  | 8  |
|                    |   | 3  | 3  |    | 2  | 0 | 8  | 8  |

|   |   |   |   |   |   |
|---|---|---|---|---|---|
|   | 6 |   | 0 | 6 | 6 |
| 3 |   | 2 | 0 | 5 | 5 |
|   | 5 |   | 0 | 5 | 5 |
| 2 | 3 |   | 0 | 5 | 5 |
|   |   | 5 | 0 | 5 | 5 |



sort the proteins for their abundance.

**Supplemental Table S4. 10 top proteins detected by mass spectrometry in mucoid and serous samples.**

A. Mucoid samples

| <b>accession</b> | <b>description</b>                    |                 | <b><u>M1</u></b> | <b><u>M2</u></b> | <b><u>M3</u></b> | <b><u>Sum</u></b> | <b><u>% M1</u></b> | <b><u>% M2</u></b> | <b><u>% M3</u></b> |
|------------------|---------------------------------------|-----------------|------------------|------------------|------------------|-------------------|--------------------|--------------------|--------------------|
| P60709           | Actin, cytoplasmic 1                  | ACTB            | 381              | 921              | 559              | <b>1861</b>       | 5.30               | 4.84               | 4.61               |
| P02788           | Lactotransferrin                      | LTF             | 408              | 849              | 338              | <b>1595</b>       | 5.68               | 4.46               | 2.79               |
| Q8TDL5           | BPI fold-containing family B member 1 | BPIFB1 / LPLUNC | 672              | 472              | 303              | <b>1447</b>       | 9.35               | 2.48               | 2.50               |
| P35579           | Myosin-9                              | MYH9            | 153              | 784              | 425              | <b>1362</b>       | 2.13               | 4.12               | 3.50               |
| P05164           | Myeloperoxidase                       | MPO             | 134              | 714              | 174              | <b>1022</b>       | 1.87               | 3.75               | 1.43               |
| P02675           | Fibrinogen beta chain                 | FGB             | 33               | 447              | 182              | <b>662</b>        | 0.46               | 2.35               | 1.50               |
| P13796           | Plastin-2                             | LCP1            | 134              | 317              | 201              | <b>652</b>        | 1.87               | 1.66               | 1.66               |
| Q9HC84           | Mucin-5B                              | MUC5B           | 271              | 222              | 141              | <b>634</b>        | 3.77               | 1.17               | 1.16               |
| P06702           | Protein S100-A9                       | S100A9          | 91               | 354              | 128              | <b>573</b>        | 1.27               | 1.86               | 1.06               |
| P01876           | Ig alpha-1 chain C                    | IGHA1           | 200              | 196              | 136              | <b>532</b>        | 2.78               | 1.03               | 1.12               |

B. Serous samples

| <b>accession</b> | <b>description</b>          |          | <b><u>S1</u></b> | <b><u>S2</u></b> | <b><u>S3</u></b> | <b><u>Sum</u></b> | <b><u>% S1</u></b> | <b><u>% S2</u></b> | <b><u>% S3</u></b> |
|------------------|-----------------------------|----------|------------------|------------------|------------------|-------------------|--------------------|--------------------|--------------------|
| P02675           | Fibrinogen beta chain       | FIBB     | 82               | 88               | 161              | <b>331</b>        | 6.19               | 4.09               | 5.04               |
| P60709           | Actin, cytoplasmic 1        | ACTB     | 43               | 82               | 198              | <b>323</b>        | 3.25               | 3.81               | 6.19               |
| P06727           | Apolipoprotein A-IV         | APOA4    | 58               | 101              | 90               | <b>249</b>        | 4.38               | 4.69               | 2.82               |
| P06396           | Gelsolin                    | GSN      | 37               | 110              | 74               | <b>221</b>        | 2.79               | 5.11               | 2.31               |
| P01861           | Ig gamma-4 chain C region   | IGHG4    |                  | 134              | 74               | <b>208</b>        |                    | 6.22               | 2.31               |
| P51884           | Lumican                     | LUM      | 62               | 88               | 55               | <b>205</b>        | 4.68               | 4.09               | 1.72               |
| P0CG05           | Ig lambda-2 chain C regions | IGLC2    | 56               | 73               | 72               | <b>201</b>        | 4.23               | 3.39               | 2.25               |
| P01876           | Ig alpha-1 chain C region   | IGHA1    | 61               | 58               | 67               | <b>186</b>        | 4.61               | 2.69               | 2.10               |
| P01011           | Alpha-1-antichymotrypsin    | SERPINA3 | 40               | 30               | 92               | <b>162</b>        | 3.02               | 1.39               | 2.88               |
| P02788           | Lactotransferrin            | LTF      | 28               | 47               | 67               | <b>142</b>        | 2.11               | 2.18               | 2.10               |

The peptide counts for each sample group (mucoid A or serous B) were summed (Sum in bold characters) and sorted to have the 10 top proteins of each group. Considering the variability in total peptide count for each sample, the proportion of peptide count was calculated (%M1, %M2, %M3, %S1, %S2, %S3).

**Supplemental Table S5. Correlations between all parameters assayed in MEEs.**

Spearman correlations were tested and regression coefficients (first value) and p values (second values) v

|                                             |                                               | Total protein concentration (mg/ml) | IL10 (pg/mL)         | MDC (pg/mL)          | IL13 (pg/mL)         | IL17A (pg/mL)        |
|---------------------------------------------|-----------------------------------------------|-------------------------------------|----------------------|----------------------|----------------------|----------------------|
| <b>Inflam<br/>matory<br/>mediat<br/>ors</b> | <b>IL10 (pg/mL)</b>                           | -0.232; 0.66                        |                      |                      |                      |                      |
|                                             | <b>MDC (pg/mL)</b>                            | -0.029; 0.96                        | <b>-0.812; 0.049</b> |                      |                      |                      |
|                                             | <b>IL13 (pg/mL)</b>                           | 0.371; 0.47                         | 0.261; 0.62          | 0.657; 0.16          |                      |                      |
|                                             | <b>IL17A (pg/mL)</b>                          | -0.058; 0.91                        | 0.647; 0.16          | <b>-0.841; 0.036</b> | 0.754; 0.08          |                      |
|                                             | <b>IL_1b (pg/mL)</b>                          | -0.058; 0.91                        | 0.471; 0.35          | -0.638; 0.17         | 0.609; 0.20          | 9,382; 0.45          |
|                                             | <b>IL6 (pg/mL)</b>                            | 0.657; 0.156                        | 0.348; 0.50          | -0.714; 0.111        | <b>0.886; 0.019</b>  | 0.638; 0.17          |
|                                             | <b>IL8 (pg/mL)</b>                            | -0.029; 0.96                        | 0.464; 0.35          | -0.600; 0.21         | 0.657; 0.16          | 0.406; 0.42          |
|                                             | <b>RANTES (pg/mL)</b>                         | -0.029; 0.96                        | 0.638; 0.17          | -0.600; 0.21         | 0.657; 0.16          | 0.551; 0.26          |
|                                             | <b>TNFa (pg/mL)</b>                           | 0.143; 0.79                         | 0.638; 0.17          | <b>-0.886; 0.019</b> | <b>0.886; 0.019</b>  | <b>0.812; 0.049</b>  |
| <b>VEGF (pg/mL)</b>                         | 0.600; 0.21                                   | 0.116; 0.83                         | -0.600; 0.21         | <b>0.943; 0.005</b>  | 0.638; 0.17          |                      |
| <b>DNA (ng/μl)</b>                          | <b>Nanodrop</b>                               | 0.257; 0.62                         | 0.116; 0.83          | -0.029; 0.96         | 0.486; 0.33          | 0.116; 0.83          |
|                                             | <b>dsDNA (Qubit)</b>                          | 0.257; 0.62                         | 0.116; 0.83          | -0.029; 0.96         | 0.486; 0.33          | 0.116; 0.83          |
| <b>Mucin I</b>                              | <b>MUC5B pixel band</b>                       | 0.086; 0.87                         | -0.203; 0.70         | 0.200; 0.70          | 0.371; 0.47          | -0.116; 0.83         |
| <b>Mass Spectrometry</b>                    | <b>Total PC</b>                               | 0.029; 0.96                         | 0.319; 0.54          | -0.600; 0.21         | <b>0.886; 0.019</b>  | 0.638; 0.17          |
|                                             | <b>Nb proteins</b>                            | 0.029; 0.96                         | 0.319; 0.54          | -0.600; 0.21         | <b>0.006; 0.019</b>  | 0.638; 0.17          |
|                                             | <b>MUC5B PC total</b>                         | 0.116; 0.83                         | 0.118; 0.82          | -0.319; 0.54         | 0.580; 0.23          | 0.118; 0.82          |
|                                             | <b>% MUC5B PC</b>                             | 0.029; 0.96                         | 0.319; 0.54          | -0.257; 0.62         | 0.371; 0.47          | 0.029; 0.96          |
|                                             | <b>MUC5B single MUC5B</b>                     | 0.143; 0.79                         | 0.232; 0.66          | -0.371; 0.47         | 0.543; 0.27          | 0.116; 0.83          |
|                                             | <b>sequence</b>                               | 0.143; 0.79                         | 0.232; 0.66          | -0.371; 0.47         | 0.543; 0.27          | 0.116; 0.83          |
|                                             | <b>IgA % PC</b>                               | 0.029; 0.96                         | -0.348; 0.50         | 0.714; 0.11          | <b>-0.886; 0.019</b> | <b>-0.899; 0.015</b> |
|                                             | <b>IgG % PC</b>                               | -0.143; 0.79                        | -0.696; 0.12         | 0.314; 0.54          | -0.086; 0.87         | -0.232; 0.66         |
|                                             | <b>IgD % PC</b>                               | <b>-0.883; 0.020</b>                | 0.508; 0.30          | -0.088; 0.87         | -0.353; 0.49         | 0.045; 0.93          |
|                                             | <b>Light chains (kappa &amp; lambda) % PC</b> | -0.371; 0.47                        | -0.406; 0.42         | 0.600; 0.21          | <b>-0.886; 0.019</b> | -0.580; 0.23         |
|                                             | <b>Complement</b>                             | 0.143; 0.79                         | -0.174; 0.74         | 0.029; 0.96          | -0.257; 0.62         | 0.058; 0.91          |
|                                             | <b>Histones</b>                               | -0.200; 0.70                        | 0.638; 0.17          | -0.771; 0.07         | 0.314; 0.54          | 0.377; 0.46          |
|                                             | <b>NET proteins</b>                           | 0.086; 0.87                         | 0.551; 0.26          | 0.714; 0.11          | <b>0.829; 0.042</b>  | 0.638; 0.17          |
| <b>Annexins</b>                             | -0.029; 0.96                                  | 0.464; 0.35                         | -0.600; 0.21         | 0.657; 0.16          | 0.406; 0.42          |                      |

|                    |             |             |              |                     |              |
|--------------------|-------------|-------------|--------------|---------------------|--------------|
| <b>HSPs</b>        | 0.371; 0.47 | 0.406; 0.42 | 0.600; 0.21  | <b>0.886; 0.019</b> | 0.580; 0.23  |
| <b>Rho Ras Rab</b> | 0.771; 0.07 | 0.030; 0.96 | -0.314; 0.54 | 0.714; 0.11         | 0.174; 0.74  |
| <b>Glycolysis</b>  | 0.371; 0.47 | 0.174; 0.74 | 0.143; 0.79  | -0.429; 0.40        | -0.232; 0.66 |

were calculated. The red values are  $p < 0.05$  and considered statistically significant.

| Inflammatory mediators |                      |                         |                      |                      |                 | DNA (                   |
|------------------------|----------------------|-------------------------|----------------------|----------------------|-----------------|-------------------------|
| IL_1b<br>(pg/mL)       | IL6 (pg/mL)          | IL8 (pg/mL)             | RANTES<br>(pg/mL)    | TNFa<br>(pg/mL)      | VEGF<br>(pg/mL) | Nanodrop                |
| 0.522; 0.29            |                      |                         |                      |                      |                 |                         |
| <b>0.986; 0.0003</b>   | 0.543; 0.27          |                         |                      |                      |                 |                         |
| <b>0.812; 0.049</b>    | 0.543; 0.27          | <b>0.886; 0.019</b>     |                      |                      |                 |                         |
| <b>0.812; 0.049</b>    | <b>0.829; 0.042</b>  | <b>0.829; 0.042</b>     | <b>0.829; 0.042</b>  |                      |                 |                         |
| 0.464; 0.35            | <b>0.943; 0.005</b>  | 0.486; 0.33             | 0.429; 0.40          | 0.771; 0.07          |                 |                         |
| 0.464; 0.35            | 0.371; 0.47          | 0.600; 0.21             | 0.771; 0.07          | 0.429; 0.40          | 0.314; 0.54     |                         |
| 0.464; 0.35            | 0.371; 0.47          | 0.600; 0.21             | 0.771; 0.07          | 0.429; 0.40          | 0.314; 0.54     | <b>0.999; &lt;0.001</b> |
| 0.493; 0.32            | 0.143; 0.79          | 0.600; 0.21             | 0.600; 0.21          | 0.257; 0.62          | 0.200; 0.70     | <b>0.886; 0.019</b>     |
| <b>0.841; 0.036</b>    | 0.657; 0.16          | <b>0.886; 0.019</b>     | <b>0.829; 0.042</b>  | <b>0.886; 0.019</b>  | 0.714; 0.11     | 0.600; 0.21             |
| <b>0.841; 0.036</b>    | 0.657; 0.16          | <b>0.886; 0.019</b>     | <b>0.829; 0.042</b>  | <b>0.886; 0.019</b>  | 0.714; 0.11     | 0.600; 0.21             |
| <b>0.912; 0.011</b>    | 0.464; 0.35          | <b>0.928; 0.008</b>     | 0.725; 0.10          | 0.638; 0.17          | 0.464; 0.35     | 0.638; 0.17             |
| <b>0.841; 0.036</b>    | 0.314; 0.54          | <b>0.886; 0.019</b>     | <b>0.829; 0.042</b>  | 0.543; 0.17          | 0.200; 0.70     | 0.771; 0.07             |
| <b>0.928; 0.008</b>    | 0.486; 0.33          | <b>0.943; 0.005</b>     | 0.771; 0.07          | 0.657; 0.16          | 0.429; 0.40     | 0.657; 0.16             |
| <b>0.928; 0.008</b>    | 0.486; 0.33          | <b>0.943; 0.005</b>     | 0.771; 0.07          | 0.657; 0.16          | 0.429; 0.40     | 0.657; 0.16             |
| -0.522; 0.29           | -0.657; 0.16         | -0.543; 0.27            | -0.542; 0.27         | <b>-0.829; 0.042</b> | -0.771; 0.07    | -0.200; 0.70            |
| -0.174; 0.74           | -0.257; 0.62         | -0.257; 0.62            | -0.600; 0.21         | -0.314; 0.54         | 0.029; 0.96     | -0.543; 0.27            |
| 0.239; 0.65            | -0.530; 0.28         | 0.235; 0.65             | 0.324; 0.53          | 0.001; 0.99          | -0.618; 0.19    | 0.029; 0.96             |
| -0.754; 0.08           | <b>-0.829; 0.042</b> | <b>-0.829; 0.042</b>    | <b>-0.886; 0.019</b> | <b>-0.886; 0.019</b> | -0.771; 0.07    | -0.771; 0.07            |
| -0.696; 0.12           | -0.086; 0.87         | -0.771; 0.07            | -0.771; 0.07         | -0.371; 0.47         | -0.029; 0.96    | <b>-0.829; 0.042</b>    |
| <b>0.812; 0.049</b>    | 0.371; 0.47          | 0.714; 0.11             | 0.486; 0.33          | 0.657; 0.16          | 0.257; 0.62     | -0.086; 0.87            |
| <b>0.899; 0.015</b>    | 0.714; 0.11          | <b>0.943; 0.005</b>     | <b>0.943; 0.005</b>  | <b>0.943; 0.005</b>  | 0.657; 0.16     | 0.657; 0.16             |
| <b>0.986; 0.0003</b>   | 0.543; 0.27          | <b>0.999; &lt;0.001</b> | <b>0.886; 0.019</b>  | <b>0.829; 0.042</b>  | 0.486; 0.33     | 0.600; 0.21             |

|              |              |              |              |              |              |              |
|--------------|--------------|--------------|--------------|--------------|--------------|--------------|
| 0.754; 0.08  | 0.829; 0.042 | 0.829; 0.042 | 0.886; 0.019 | 0.886; 0.019 | 0.771; 0.07  | 0.771; 0.07  |
| 0.551; 0.26  | 0.829; 0.042 | 0.600; 0.21  | 0.543; 0.27  | 0.600; 0.21  | 0.771; 0.07  | 0.657; 0.16  |
| -0.696; 0.12 | -0.086; 0.87 | -0.772; 0.07 | -0.771; 0.07 | -0.486; 0.33 | -0.143; 0.79 | -0.714; 0.11 |

---

| (ng/μl)       | Mucin blot       |               |               |                |               |                       |
|---------------|------------------|---------------|---------------|----------------|---------------|-----------------------|
| dsDNA (Qubit) | MUC5B pixel band | Total PC      | Nb proteins   | MUC5B PC total | % MUC5B PC    | MUC5B single peptides |
| 0.886; 0.019  |                  |               |               |                |               |                       |
| 0.600; 0.21   | 0.600; 0.21      |               |               |                |               |                       |
| 0.600; 0.21   | 0.600; 0.21      | 0.999; <0.001 |               |                |               |                       |
| 0.638; 0.17   | 0.754; 0.08      | 0.812; 0.049  | 0.812; 0.049  |                |               |                       |
| 0.771; 0.07   | 0.771; 0.07      | 0.657; 0.16   | 0.657; 0.16   | 0.899; 0.015   |               |                       |
| 0.657; 0.16   | 0.714; 0.11      | 0.771; 0.07   | 0.771; 0.07   | 0.986; 0.0003  | 0.943; 0.005  |                       |
| 0.657; 0.16   | 0.714; 0.11      | 0.771; 0.07   | 0.771; 0.07   | 0.986; 0.0003  | 0.943; 0.005  | 0.999; <0.001         |
| -0.200; 0.70  | -0.143; 0.79     | -0.829; 0.042 | -0.829; 0.042 | -0.377; 0.46   | -0.143; 0.79  | -0.314; 0.54          |
| -0.542; 0.27  | -0.143; 0.79     | -0.086; 0.87  | -0.086; 0.87  | -0.058; 0.91   | -0.429; 0.40  | -0.200; 0.70          |
| 0.029; 0.96   | 0.059; 0.91      | 0.029; 0.96   | 0.029; 0.96   | 0.045; 0.93    | 0.294; 0.57   | 0.088; 0.87           |
| -0.771; 0.07  | -0.600; 0.21     | -0.886; 0.019 | -0.886; 0.019 | -0.754; 0.08   | -0.714; 0.11  | -0.771; 0.07          |
| -0.829; 0.042 | -0.886; 0.019    | -0.600; 0.21  | -0.600; 0.21  | -0.812; 0.049  | -0.943; 0.005 | -0.829; 0.042         |
| -0.086; 0.87  | -0.086; 0.87     | 0.486; 0.33   | 0.486; 0.33   | 0.551; 0.26    | 0.486; 0.33   | 0.600; 0.21           |
| 0.657; 0.16   | 0.543; 0.27      | 0.943; 0.005  | 0.943; 0.005  | 0.812; 0.049   | 0.771; 0.07   | 0.829; 0.042          |
| 0.600; 0.21   | 0.600; 0.21      | 0.886; 0.019  | 0.886; 0.019  | 0.928; 0.008   | 0.886; 0.019  | 0.943; 0.005          |

|              |               |              |              |              |             |              |
|--------------|---------------|--------------|--------------|--------------|-------------|--------------|
| 0.771; 0.07  | 0.600; 0.21   | 0.886; 0.019 | 0.886; 0.019 | 0.754; 0.08  | 0.714; 0.11 | 0.771; 0.07  |
| 0.657; 0.16  | 0.543; 0.27   | 0.600; 0.21  | 0.600; 0.21  | 0.696; 0.12  | 0.600; 0.21 | 0.714; 0.11  |
| -0.714; 0.11 | -0.829; 0.042 | -0.771; 0.07 | -0.771; 0.07 | -0.754; 0.08 | 0.991; 0.07 | -0.714; 0.11 |

---



---

**Mass Spectrometry**


---

| <b>MUC5B<br/>sequence<br/>coverage</b> | <b>IgA % PC</b> | <b>IgG % PC</b> | <b>IgD % PC</b> | <b>Light chains<br/>(kappa and<br/>lambda) %<br/>PC</b> | <b>Compleme<br/>nt</b> | <b>Histones</b> | <b>NET<br/>proteins</b> |
|----------------------------------------|-----------------|-----------------|-----------------|---------------------------------------------------------|------------------------|-----------------|-------------------------|
| -0.314; 0.54                           |                 |                 |                 |                                                         |                        |                 |                         |
| -0.200; 0.70                           | -0.086; 0.87    |                 |                 |                                                         |                        |                 |                         |
| 0.088; 0.87                            | 0.089; 0.87     | -0.294; 0.57    |                 |                                                         |                        |                 |                         |
| -0.711; 0.07                           | 0.657; 0.16     | 0.429; 0.40     | 0.147; 0.78     |                                                         |                        |                 |                         |
| <b>-0.829; 0.042</b>                   | 0.086; 0.87     | 0.371; 0.47     | -0.412; 0.41    | 0.600; 0.21                                             |                        |                 |                         |
| 0.600; 0.21                            | -0.371; 0.47    | -0.086; 0.87    | 0.324; 0.53     | -0.371; 0.47                                            | -0.257; 0.62           |                 |                         |
| <b>0.829; 0.042</b>                    | -0.714; 0.11    | -0.371; 0.47    | 0.118; 0.82     | <b>-0.943; 0.005</b>                                    | -0.657; 0.16           | 0.600; 0.21     |                         |
| <b>0.943; 0.005</b>                    | -0.543; 0.27    | -0.257; 0.62    | 0.235; 0.65     | <b>-0.829; 0.042</b>                                    | -0.771; 0.07           | 0.714; 0.11     | <b>0.943; 0.005</b>     |

---

|              |              |              |              |               |              |              |              |
|--------------|--------------|--------------|--------------|---------------|--------------|--------------|--------------|
| 0.771; 0.07  | -0.657; 0.16 | -0.429; 0.40 | -0.147; 0.78 | 0.999; <0.001 | -0.600; 0.21 | 0.371; 0.47  | 0.943; 0.005 |
| 0.714; 0.11  | -0.314; 0.54 | -0.257; 0.62 | -0.559; 0.25 | -0.829; 0.042 | -0.429; 0.40 | 0.200; 0.70  | 0.657; 0.16  |
| -0.714; 0.11 | 0.429; 0.40  | 0.143; 0.79  | -0.471; 0.35 | 0.600; 0.21   | 0.886; 0.019 | -0.257; 0.62 | 0.714; 0.11  |

---

| <b>Annexins</b> | <b>HSPs</b> | <b>Rho Ras<br/>Rab</b> |
|-----------------|-------------|------------------------|
|-----------------|-------------|------------------------|

0.829; 0.042

0.600; 0.21 0.829; 0.042

-0.771; 0.07 -0.600; 0.21 -0.257; 0.62
